1 **Title page**

2 **Complete Title:** Anatomic development of the upper airway during the first five years of life: A  
3 three-dimensional imaging study

4  
5 **Authors:**

6 Ying Ji Chuang<sup>1</sup>, Seong Jae Hwang<sup>2</sup>, Kevin A. Buhr<sup>3</sup>, Courtney A. Miller<sup>1</sup>, Gregory. D. Avey<sup>4</sup>,  
7 Brad H. Story<sup>5</sup>, and Houri K. Vorperian<sup>1\*</sup>

8  
9 **Institution:**

10 <sup>1</sup> Vocal Tract Development Lab, Waisman Center, University of Wisconsin-Madison, Madison,  
11 Wisconsin, United States of America

12  
13 <sup>2</sup> Department of Computer Science, University of Pittsburgh, Pittsburg, Pennsylvania, United  
14 States of America

15  
16 <sup>3</sup> Department of Biostatistics and Medical Informatics, University of Wisconsin-Madison,  
17 Madison, Wisconsin, United States of America

18  
19 <sup>4</sup> Department of Radiology, University of Wisconsin School of Medicine and Public Health,  
20 Madison, Wisconsin, United States of America

21  
22 <sup>5</sup> Speech, Language, and Hearing Sciences, University of Arizona, Tucson, Arizona, United  
23 States of America

24  
25 **\*Corresponding author:** E-mail: [vorperian@waisman.wisc.edu](mailto:vorperian@waisman.wisc.edu) HKV

26  
27 **Abbreviated/running title:** Upper airway development during early childhood using CT

28 **Funding:** The authors are grateful for National Institutes of Health (NIH) funding support from  
29 the National Institute on Deafness and Other Communication Disorders (NIDCD) R01  
30 DC006282 (HKV) and from the National Institute of Child Health and Human Development  
31 (NICHD) U54 HD090256 (QC). There was no involvement of the funding sources in the  
32 research design, data collection, analysis, interpretation, writing of this paper or submission for  
33 publication.

## 34 **Abstract**

35 **Purpose.** Normative data on the growth and development of the upper airway across the sexes is  
36 needed for the diagnosis and treatment of congenital and acquired respiratory anomalies and to  
37 gain insight on developmental changes in speech acoustics and disorders with craniofacial  
38 anomalies. **Methods.** The growth of the upper airway in children ages birth-to-five years, as  
39 compared to adults, was quantified using an imaging database with computed tomography  
40 studies from typically developing individuals. Methodological criteria for scan inclusion and  
41 airway measurements included: head position, histogram-based airway segmentation, anatomic  
42 landmark placement, and development of a semi-automatic centerline for data extraction. A  
43 comprehensive set of 2D and 3D supra- and sub-glottal measurements from the choanae to  
44 tracheal opening were obtained including: naso-oro-laryngo-pharynx subregion volume and  
45 length, each subregion's superior and inferior cross-sectional-area, and antero-posterior and  
46 transverse/width distances. **Results.** Growth of the upper airway during the first five years of life  
47 was more pronounced in the vertical and transverse/lateral dimensions than in the antero-  
48 posterior dimension. By age five years, females have larger pharyngeal measurement than males.  
49 Prepubertal sex-differences were identified in the subglottal region. **Conclusions.** Our findings  
50 demonstrate the importance of studying the growth of the upper airway in 3D. As the lumen  
51 length increases, its shape changes, becoming increasingly elliptical during the first five years of  
52 life. This study also emphasizes the importance of methodological considerations for both image  
53 acquisition and data extraction, as well as the use of consistent anatomic structures in defining  
54 pharyngeal regions.

55 **Key words:** upper airway; pharynx; development; volume; aerodigestive tract; vocal tract  
56 length.

## 57 **Introduction**

58 The upper airway, a virtual conduit as characterized by Marcus et al. (2009), has an anatomic  
59 boundary defined by other tissues (bony, cartilaginous and soft) while serving the functions of  
60 respiration, food ingestion (mastication and deglutition), as well as vocalization/speech, hence  
61 the function-based terms ‘*aerodigestive tract*’, ‘*vocal tract*’, or more comprehensively the  
62 ‘*aerodigestive and vocal tract*’. During the course of development, especially from infancy to  
63 early childhood, the upper airway undergoes drastic changes in size, shape and mechanical  
64 properties due to the restructuring of its anatomical sub-components, such as the descent of the  
65 larynx and the hyoid bone (Laitman & Crelin, 1976; Roche & Barkla, 1987; Vorperian et al.,  
66 2005). The anatomic growth process persists while adapting to the various functional needs and  
67 demands during maturation. As posited by current theory on craniofacial growth, the  
68 development of the upper airway is shaped by both genetic as well as intrinsic and extrinsic  
69 epigenetic factors, such as function, mechanical forces, and trauma (Enlow & Hans, 1996; Moss,  
70 1997a,b,c,d; Carlson; Standerwick & Roberts, 2009; Lieberman, 2011; Castaldo & Cerritelli,  
71 2015).

72 The lack of knowledge regarding the growth and development of the upper airway,  
73 defined as the air conduit from the level of the nose to the carina, was addressed in a workshop  
74 by the National Heart, Lung, and Blood Institute (NHLBI) in 2009 with a large team of clinicians  
75 and scientists from diverse fields in healthcare and the biological sciences (Marcus et al., 2009).  
76 The outcome was a comprehensive set of research guidelines on various aspects of the upper  
77 airway, each with a set of priorities relevant to clinical disorders of upper airway functions.  
78 Among the priorities was the need to study the developmental changes of the upper airway  
79 anatomy and function during childhood (neonatal to puberty) across sexes and ethnicities and to

80 provide normative values of the upper airway. Normative data are needed to better understand  
81 common respiratory disorders such as obstructive sleep apnea syndrome (OSAS), as well as a  
82 number of other congenital and acquired respiratory anomalies (Marcus et al., 2009).  
83 Furthermore, normative data can provide additional insight on developmental speech acoustics  
84 (Kent & Murray, 1982; Gilbert et al., 1997), as well as speech disorders, particularly where  
85 craniofacial anomalies are present (Bunton & Leddy, 2011; Kent & Vorperian, 2013). As listed  
86 in Table 1, a large number of studies have examined the upper airway anatomy using different  
87 modalities, methodologies, airway regions, and age ranges. Table 1 summarizes the studies to  
88 date that have examined the typical development of the aerodigestive and vocal tract from the  
89 choanae or the soft palate superiorly to the epiglottis or the trachea inferiorly. A subset of studies  
90 listed have factored in growth and/or sex in their data analysis. Most studies have employed  
91 imaging to obtain quantitative measurements, including linear, angular and/or area  
92 measurements, based on the midsagittal or axial slices, as well as volumetric measurements.  
93 However, only a very limited number of studies have assessed multidimensional volumetric  
94 measurements during early childhood. Among the 34 studies listed in Table 1, only 17 studies  
95 included linear, area and volumetric measurements, and fewer than half of those studies  
96 controlled for head position during or after data acquisition. Of the 12 studies summarized in  
97 Table 1 that examined the pre-pubertal age-group, the majority obtained measurements in 2D  
98 that were collected primarily from radiographic images using mid-sagittal, axial, or coronal  
99 visualization planes; an approach frequently used to assess the upper airway, as it is cost  
100 effective and less time-consuming to process. However, this approach does not provide accurate  
101 representation of the complex airway morphology, as it overlooks information of lateral  
102 dimensions (Ono et al., 2000; Eslami et al., 2017). Two of those 12 studies (Abramson et al.,

103 2009; Smitthimedhin et al., 2018) quantified the prepubertal airway in 3D but only Abramson et  
104 al. (2009) covered the entire prepubertal period from birth to five years and assessed sexual  
105 dimorphism. Neither of those retrospective studies reported controlling for head position or using  
106 it as an inclusion criterion.

107

108 **Table 1. Summary of studies on typical upper airway development.**

| Methodology |                            | Study                      |                    |             | Age Cohort (yrs) |                 |                  |                | Assessment/Control |               | Measurement Type |               |         |        |                           | Airway Region                       |
|-------------|----------------------------|----------------------------|--------------------|-------------|------------------|-----------------|------------------|----------------|--------------------|---------------|------------------|---------------|---------|--------|---------------------------|-------------------------------------|
| Type        | Modality                   | Author (year) <sup>a</sup> | n = Total (M/F)    | Age         | Pre-Pub (0-5)    | Peri-Pub (6-10) | Pubertal (11-17) | Post-Pub (18+) | Sexual Dimorphism  | Head Position | Distance         | Region Length | CSA (*) | Volume | Center-line               |                                     |
| 2D          | CT                         | Ronen et al. (2007)        | n = 69 (38/31)     | 4-10, 14-19 | +                | +               | +                | +              | +                  |               | YES              |               |         |        |                           | PNS - hyoid superior                |
|             | CT, MRI                    | Vorperian et al. (2009)    | n = 605 (327/278)  | 0-19        | +                | +               | +                | +              | +                  |               | YES              | YES           |         |        |                           | Choanae - glottis                   |
|             | MRI                        | Fitch & Giedd (1999)       | n = 129 (76/53)    | 2-25        | +                | +               | +                | +              | +                  |               | YES              | YES           |         |        |                           | PNS - C4ai                          |
|             | MRI                        | Litman et al. (2002)       | n = 16 (9/7)       | 10mos-7yrs  | +                | +               |                  |                |                    | +             | YES              |               | YES (a) |        |                           | Oral-pharyngeal                     |
|             | MRI                        | Machata et al. (2010)      | n = 138 (60/78)    | 0-6         | +                | +               |                  |                |                    | +             | YES              |               | YES (a) |        |                           | Soft palate - tongue                |
|             | MRI                        | Yi et al. (2017)           | n = 521 (296/225)  | 0-6         | +                | +               |                  |                | +                  |               | YES              |               |         |        |                           | Soft palate - tip of epiglottis     |
|             | MRI                        | Fregosi et al. (2003)      | n = 18 (13/5)      | 7-12        |                  | +               | +                |                |                    |               | YES              |               | YES (a) | YES    |                           | Choanae - epiglottis base           |
|             | X-ray                      | Barbier et al. (2015)      | n = 966 (494/470)  | 0-25        | +                | +               | +                | +              | +                  |               | YES              | -             | -       | -      | -                         | PNS - tip of epiglottis             |
|             | X-ray                      | Goncalves et al. (2011)    | n = 390 (195/195)  | 6-18        |                  | +               | +                | +              | +                  |               | YES              |               |         |        |                           | Oral-pharyngeal                     |
|             | X-ray                      | Sheng et al. (2009)        | n = 239 (107/132)  | 7-27        |                  | +               | +                | +              | +                  |               | YES              |               |         |        |                           | PNS - mandible/pharynx intersection |
|             | X-ray                      | Mislik et al. (2014)       | n = 880 (458/422)  | 6-17        |                  | +               | +                |                |                    |               | YES              |               |         |        |                           | PNS - epiglottis base               |
| X-ray       | Daraze et al. (2017)       | n = 117 (48/69)            | 21-25              |             |                  |                 | +                |                | +                  | YES           |                  |               |         |        | PNS - tip of epiglottis   |                                     |
| Fluoroscopy | Rommel et al. (2003)       | n = 23 (14/9)              | 0-4                | +           |                  |                 |                  |                | +                  | YES           | YES              |               |         |        | Choanae - epiglottis base |                                     |
| 3D          | CBCT                       | Chiang et al. (2012)       | n = 387 (173/214)  | 8-18        |                  | +               | +                | +              | +                  | +             | YES              |               | YES     | YES    | YES                       | PNS - C4ai                          |
|             | CBCT                       | Jiang et al. (2014)        | n = 254 (119/135)  | 6-18        |                  | +               | +                | +              | +                  | +             | YES              | YES           | YES (x) | YES    |                           | Choanae - hyoid superior            |
|             | CBCT                       | Lenza et al. (2010)        | n = 34 (14/20)     | 11-56       |                  | +               | +                | +              |                    |               | YES              |               | YES (x) | YES    |                           | Choanae - tip of epiglottis         |
|             | CBCT                       | Schendel et al. (2012)     | n = 1300 (571/729) | 6-60        |                  | +               | +                | +              | +                  |               | YES              |               | YES (a) | YES    |                           | PNS - C4as                          |
|             | CBCT                       | Anandarajah et al. 2017    | n = 105 (44/61)    | 7-13        |                  | +               | +                |                |                    |               |                  |               | YES (a) | YES    |                           | PNS - epiglottis base               |
|             | CBCT                       | Masoud et al. (2020)       | n = 81 (32/49)     | 7-17        |                  | +               | +                |                |                    | +             | YES              | YES           | YES (a) | YES    |                           | Choanae - epiglottis base           |
|             | CBCT                       | Yanagita et al. (2017)     | n = 61 (0/12)      | 10-16       |                  | +               | +                |                |                    | +             | YES              | YES           | YES (a) | YES    |                           | Choanae - epiglottis base           |
|             | CBCT                       | Alves et al. (2012)        | n = 50 (27/23)     | 8-10        |                  | +               |                  |                |                    | +             | YES              |               | YES (a) | YES    |                           | PNS - tip of epiglottis             |
|             | CBCT                       | Claudino et al. (2013)     | n = 54 (21/33)     | 13-20       |                  |                 | +                | +              | +                  | +             | YES              | YES           | YES (a) | YES    |                           | Choanae - hyoid inferior            |
|             | CT                         | Abramson et al. (2009)     | n = 46 (31/15)     | 4mos-64yrs  | +                | +               | +                | +              | +                  |               | YES              |               | YES (a) | YES    |                           | PNS - epiglottis base               |
|             | CT                         | Li et al. (2011)           | n = 281 (141/140)  | 10-18       |                  | +               | +                | +              |                    | +             | YES              | YES           | YES (a) | YES    |                           | PNS - epiglottis base               |
|             | CT                         | Kim et al. (2011)          | n = 73 (64/9)      | 14-72       |                  |                 | +                | +              | +                  | +             | YES              |               | YES (a) | YES    |                           | PNS - hyoid superior                |
|             | CT                         | Gibelli et al. (2020)      | n = 80 (40/40)     | 21-86       |                  |                 | +                | +              | +                  | +             | YES              |               |         | YES    |                           | Choanae - glottis                   |
|             | CT                         | Inamoto et al. (2015)      | n = 107 (30/77)    | 23-77       |                  |                 |                  | +              | +                  | +             | YES              |               |         | YES    |                           | PNS - Glottis                       |
|             | CT                         | Shigeta et al. (2008)      | n = 38 (19/19)     | 24-84       |                  |                 |                  | +              | +                  | +             | YES              | YES           |         | YES    |                           | PNS - tip of epiglottis             |
| MRI         | Smithimedhin et al. (2018) | n = 96 (53/43)             | 0.5-46wks          | +           |                  |                 |                  |                |                    |               |                  |               | YES     |        | Choanae - trachea         |                                     |
| MRI         | Welch et al. (2002)        | n = 12 (0/12)              | 30-64              |             |                  |                 | +                |                | +                  | YES           |                  | YES           | YES     | YES    | PNS - tip of epiglottis   |                                     |
| Other       | Aph                        | Leboulanger et al. (2011)  | n = 59 (28/31)     | 2-18        | +                | +               | +                | +              | +                  | +             |                  |               | YES     |        |                           | Oral-pharyngeal                     |
|             | Aph                        | Martin et al. (1997)       | n = 114 (60/54)    | 16-74       |                  |                 | +                | +              | +                  |               |                  |               | YES     | YES    |                           | Oral-pharyngeal                     |
|             | Aph, Spiro                 | Brooks et al. (1992)       | n = 175 (77/98)    | 19-64       |                  |                 |                  | +              | +                  |               |                  |               | YES     | YES    |                           | Airway                              |
|             | Aph, Spiro                 | Brown et al. (1986)        | n = 24 (14/10)     | 26-42       |                  |                 |                  | +              | +                  |               |                  |               | YES     | YES    |                           | Airway                              |

109 Summary of studies on typical upper airway development listed per methodology in the **first** column, using measurement type/dimension: 2D,  
110 two-dimensional, indicates that measurements were collected from radiographic images representing either the mid-sagittal, axial or coronal  
111 visualization planes; 3D, three-dimensional, indicates that measurements were collected utilizing multiplanar visualizations (axial, coronal

112 and/or sagittal planes) and 3D representation of the upper airway; Other indicates that measurements were made using non-imaging techniques.  
113 The first column also lists alphabetically study modality including imaging (CT, CBCT, MRI, X-ray) or non-imaging (Acoustic Pharyngometry  
114 (APh), Spirometer (Spiro)) techniques. The **second** column lists alphabetically the Study author(s) with year of publication in parentheses,  
115 sample size (n=) with total Male/Female (M/F) numbers specified in parentheses, and age range examined. Age of study participants is also  
116 classified using pubertal age cohorts in the **third** column, followed by assessment or control of sex-differences and head position in the **fourth**  
117 column. The **fifth** column lists measurement reported including overall pharyngeal distance, and pharyngeal region/subregion measurements  
118 including: length, cross-sectional area\* (CSA), volume and centerline length. The **final** column lists the defined superior to inferior anatomical  
119 boundaries in each study.

120 \* CSA specifications include the automatic or manual calculation of the area of a plane of the pharyngeal airway in: the axial plane (a), a plane  
121 that is orthogonal to the pharyngeal centerline (o), or a plane connecting two or more specific anatomical landmarks (x).

122

123

124            Since the upper airway is a lumen, attention must be paid to a number of methodological  
125 considerations, given their potential effect on various pharyngeal measurements. Methodological  
126 procedures known to affect pharyngeal measurements include head/neck position  
127 (flexion/extension), body position (upright/supine), and sedation (Lenza et al., 2010; Gurani et  
128 al., 2016; Di Carlo et al., 2017). While most studies to date have accounted for one or more of  
129 these confounders, it is difficult to compare findings across studies unless all confounders have  
130 been addressed. For example, Inamoto et al. (2015), reported significant sex differences between  
131 the adult male and female laryngopharynx, but Gibelli et al. (2020), who also used CT but did  
132 not control for head position, reported no sex differences. Additionally, variations in the  
133 anatomical boundary and subregion borders of the upper airway morphology (nasopharynx,  
134 oropharynx, and laryngopharynx/hypopharynx) as defined by different studies, summarized in  
135 Table 1 (final column) and Table 2, further complicates the ease and feasibility of comparing  
136 findings across studies. Thus, to ensure an accurate and reliable assessment of the developmental  
137 changes of this cavity, it is critical to use standardized imaging procedures, well-defined  
138 anatomical regions, and established airway data extraction protocols.  
139



140 **Table 2. Summary of boundaries of the pharyngeal regions.**

| <b>Main Pharyngeal Subdivisions</b>    | <b>Anatomical boundaries</b> | <b>Definitions<sup>b</sup></b>                                                                                                                                                                                                                                                                         |
|----------------------------------------|------------------------------|--------------------------------------------------------------------------------------------------------------------------------------------------------------------------------------------------------------------------------------------------------------------------------------------------------|
| <b>Nasopharynx</b>                     | <b>Superior Border</b>       | Nares (Ayappa & Rapoport, 2002)<br>Nasal cavity (Adewale, 2009)<br>End of nasal septum (Netter, 2019)<br>Choanae (Arens et al., 2004; Logan et al., 2017; Schuenke et al., 2010)                                                                                                                       |
|                                        | <b>Inferior Border</b>       | Hard palate (Ayappa & Rapoport, 2002)<br>Soft palate (Laird et al., 2019 ; Moore et al., 2006; Standring et al., 2017)<br>Level of soft palate (Arens et al., 2004)<br>Above soft palate (Adewale, 2009; Gu et al., 2016 )<br>Inferior/Lower border of soft palate (Netter, 2019; Logan et al., 2017 ) |
| <b>Oropharynx</b>                      | <b>Superior Border</b>       | Soft palate (Ayappa & Rapoport, 2002)<br>Uvula (Schuenke et al., 2010)                                                                                                                                                                                                                                 |
|                                        | <b>Inferior Border</b>       | Epiglottis (Ayappa & Rapoport, 2002; Schuenke et al., 2010)<br>Superior/Upper border of epiglottis (Gu et al., 2016; Laird et al., 2019 ; Moore et al., 2006; Netter, 2019; Standring et al., 2017)<br>Larynx (Arens et al., 2004)                                                                     |
| <b>Laryngopharynx/<br/>Hypopharynx</b> | <b>Superior Border</b>       | Posteriorlateral to the larynx (Arens et al., 2004)<br>Base of tongue (Ayappa & Rapoport, 2002)<br>Tip of epiglottis (Adewale, 2009)<br>Superior/Upper border of epiglottis (Logan et al., 2017 )                                                                                                      |
|                                        | <b>Inferior Border</b>       | Larynx (Ayappa & Rapoport, 2002)<br>Opening of esophagus (Netter, 2019)<br>Cricoid cartilage (Schuenke et al., 2010)<br>Inferior/Lower border of cricoid cartilage (Adewale, 2009; Gu et al., 2016; Laird et al., 2019; Logan, 2017; Moore et al., 2006; Standring et al., 2017)                       |

141 Summary of pharyngeal regions' boundaries as defined in relevant anatomy textbooks and  
 142 published papers. Note the lack of consistency and/or specificity in the anatomical boundaries for  
 143 each region.

144

145

146           This study aims to systematically study the anatomic development of the upper airway,  
147 specifically the structural changes from the choanae to the tracheal opening (inferior border of  
148 the cricoid cartilage) from birth to five years, as compared to adults. To acquire normative data  
149 of the anatomy that subserve the aerodigestive and speech functions, we used an imaging  
150 database with computed tomography (CT) studies from typically developing individuals to  
151 obtain a comprehensive set of two-dimensional (2D) and three-dimensional (3D) measurements  
152 quantifying the growth of the upper airway. Our comprehensive set of methodological criteria  
153 included control of head position, histogram-based upper airway segmentation, placement of  
154 anatomic landmarks, and development of a semi-automatic method to determine lumen  
155 centerline. In addition, to better understand the resonance/acoustic characteristics of the vocal  
156 tract, this study aimed to examine the nature of the developmental changes of the upper airway  
157 dimensions and to determine if there are sex differences in the upper airway dimensions during  
158 the pre-pubertal period. We hypothesize all pediatric airway dimensions to be substantially  
159 smaller than adult dimensions. We also hypothesize sex differences in both children and adults.

160

## 161 **Materials and methods**

### 162 **a. Image acquisition/dataset**

163 Using imaging studies performed at the University of Wisconsin Hospital and Clinics (UWHC),  
164 our Vocal Tract Development Lab (VTLab) has curated a lifespan retrospective database of more  
165 than 2000 head and neck CT scans to study the anatomic growth and development of the oral and  
166 pharyngeal structures. This database was established following approval of the University of  
167 Wisconsin-Madison Institutional Review Board (IRB) and anonymized accordingly. All CT  
168 imaging studies, performed in the supine body position, were acquired using CT scanners

169 manufactured by General Electric Medical Systems or Siemens and stored in Digital Imaging  
170 and Communications in Medicine (DICOM) format. Additional details on this imaging database  
171 and image acquisition are provided in Kelly et al. (2017), Miller et al. (2019a; 2019b) and  
172 Vorperian et al. (2009).

173 To ensure the adequacy of imaging studies selected for this study, the VTLab imaging  
174 database was reviewed for typically developing cases between the ages 0-5 years (pediatric) and  
175 20-30 years (adults) who were imaged for conditions that do not affect typical growth. A total of  
176 410 (208 Males (M), and 202 Females (F)) CT imaging studies that included 264 (161M, 103F)  
177 pediatric scans and 146 (47M, 99F) adult scans, from 276 (143M, 133F) individuals (195 [115M,  
178 80F] children; and 81 [28M, 53F] adults), were inspected for cases that met the following  
179 inclusion criteria: (1) slice thickness  $\leq 2.5\text{mm}$ , (2) 14-22cm field-of-view (FOV), (3) 512x512  
180 matrix size, (4) no movements or dental artifacts affecting the view of pharynx structure, and (5)  
181 neutral or flexed head position as confirmed using Miller et al.'s (2019b) head position  
182 classification protocol. While all extreme flexion/extension cases were excluded, including all  
183 sedation cases, neutral-flexed head position cases were not excluded given that the larger infant  
184 head is prone to being flexed in the supine position. The total yield of cases that met the  
185 inclusion criteria for this study's dataset included 61 (32M, 29F) pediatric cases from 78 imaging  
186 studies (41M, 37F), and 17 (9M, 8F) adult cases from 72 (39M, 33F) imaging studies. The  
187 individuals whose images were used included 56 (31M, 25F) children, and 16 (8M, 8F) adults.  
188 Age specific demographics are presented in Table 3.

189

190

191 **Table 3. Distribution of male and female cases per age group.**

| <b>Group (Age range (yr;mos))</b> | <b>M</b> | <b>F</b> | <b>Total</b> |
|-----------------------------------|----------|----------|--------------|
| <1 (00;00 - 00;11)                | 4        | 5        | 9            |
| 1 (01;00 - 01.11)                 | 4        | 5        | 9            |
| 2 (02;00 - 02.99)                 | 6        | 7        | 13           |
| 3 (03;00 - 03.99)                 | 9        | 8        | 17           |
| 4 (04;00 - 05;00)                 | 6        | 7        | 13           |
| 5 (20;00 - 30;00)                 | 8        | 9        | 17           |

192 Distribution of male (M) and female (F) cases per age group. Age groups specified in years;  
193 months (group <1 includes cases birth 00;00 to 11 months 00;11; group 1 includes cases 1 year  
194 (01;00) to 1 year 11 months (01;11) etc.).

195

196

## 197 **b. Image reconstruction**

198 The standard reconstruction kernel was the preferred CT reconstruction algorithm, and was  
199 available for the majority of the imaging studies. For cases/imaging studies processed without  
200 the standard kernel, imaging features of the standard kernel were simulated by processing the  
201 soft kernel with an unsharp enhance filter using a kernel size of 5x5, or the by processing the  
202 bone kernel with a low pass filter using a kernel size of 3x3. Next, the software Analyze 12.0  
203 (AnalyzeDirect, 2018, Overland Park, KS) was used to reconstruct CT images from DICOM  
204 format into 3D volume.

205 A histogram-based threshold method was applied to the reconstructed CT volume in  
206 order to identify the intensity in Hounsfield Unit (HU) that allows an optimal representation of  
207 the airway. Guided by the technique of Nakano et al. (2013), per image, we used the midpoint

208 between the soft tissue peak (+100 HU to +300 HU) and air threshold peak (-1000 HU), as the  
209 applied upper threshold intensity to segment the airway. The range of upper thresholds used in  
210 this study was between -556 HU and -445 HU. The Volume Render and Volume Edit modules  
211 were then used to visualize and segment the 3D pharynx model from the reconstructed CT  
212 volume. Using the identified threshold value, the airway region studied was restricted inferiorly  
213 at the first tracheal ring (lower limit of the cricoid cartilage), and superiorly at the choanae. The  
214 resulting 3D pharynx model was saved in Analyze Object Map format [.obj].

215

### 216 **c. Anatomic landmarks and variables**

217 As depicted in Figs 1 and 2, and listed with descriptions in Table 4, a set of 26 anatomic  
218 landmarks that included 20 pharyngeal, 4 maxillary, and 2 reference landmarks were manually  
219 placed on each of the 78 3D pharynx models to quantify upper airway growth. The set of  
220 landmarks selected were carefully determined following a thorough review of landmarks and  
221 airway variables examined in studies to date (Fitch & Giedd, 1999; Abramson et al., 2009;  
222 Vorperian et al., 2011; Jiang et al., 2014; Inamoto et al., 2015; Gurani et al., 2016). Landmark  
223 placement entailed using the Volume Render module in Analyze 12.0 (AnalyzeDirect, 2018,  
224 Overland Park, KS), to manually place each of the 26 landmarks by overlaying them on their  
225 respective CT images while using the axial, coronal and sagittal planes to guide accuracy of  
226 landmark placement. The landmarks were similarly saved in Analyze Object Map format. To  
227 ensure reliability in landmark placement, prior to data collection, two researchers modeled and  
228 placed landmarks on six cases. The differences in resulting measurements, calculated from the  
229 raters' landmarks, had an average relative error (ARE) that was less than or equal to 5% between  
230 researchers. The landmarks were then used to establish a data extraction protocol, described in

231 the following section, that generates pharyngeal cross sections perpendicular to the centerline  
232 and calculates landmark-based measurements. The comprehensive set of 30 pharyngeal variables  
233 measured, as listed and defined in Table 5 below after the following section, are described in the  
234 section on variable measurements.

235

236 **Fig 1. Illustration of airway regions and measurements.** The airway was examined using  
237 landmark-derived planes orthogonal to the centerline, as described in text. The four airway  
238 regions bounded by five cross sectional areas, a-to-d as depicted in the right panel, were  
239 quantified developmentally using the following measurements: volume, region length, cross-  
240 sectional area (CSA), anterior-posterior distance, and lateral width - as defined in Table 5. The  
241 airway regions above the glottis (d; Table 5, definition 19), included the following pharyngeal  
242 regions: a. *Nasopharynx* (blue; definition 1); b. *Oropharynx* (red; definition 6); c.  
243 *Laryngopharynx* (cyan; definition 11); and the airway below the glottis consisted of the  
244 *subglottal* region (magenta; definition 22). The pharynx (Table 5, definition 16) consisted of all  
245 three supraglottal regions

246 **Fig 2. 3D airway model** (choana to trachea) of a 4-year 8-month old typically developing male  
247 as visualized in MATLAB. Blue dots represent the anatomic landmarks. Centerline is shown in  
248 green, and CSAs closest to each of the anatomic landmarks are shown in red.

249

250 **Table 4. Description/definition of the 26 anatomic landmarks.**

| #                          | Description of landmarks                                                                                                                                                                                                                   | Landmark Name                    | Abbreviation |
|----------------------------|--------------------------------------------------------------------------------------------------------------------------------------------------------------------------------------------------------------------------------------------|----------------------------------|--------------|
| <b>Pharynx Landmarks</b>   |                                                                                                                                                                                                                                            |                                  |              |
| 1                          | The point of attachment of the vocal folds with the thyroid cartilage at the anterior commissure, 2-3 mm below the thyroid notch of the larynx.                                                                                            | Glottis Anterior                 | (ga)         |
| 2                          | In the axial plane at the level of the glottis as determined by the tear-shaped glottal area (GA), the most posterior point of the laryngo-pharynx between the lateral-most sides of the vocal folds attached to the arytenoid cartilages. | Glottis Posterior                | (gp)         |
| 3                          | Most superior and posterior point of the epiglottis in the midsagittal plane.                                                                                                                                                              | Epiglottis Superior              | (epS)        |
| 4                          | Attachment of the epiglottis with the hyoepiglottic ligament, visualized as the most anteroinferior point of contact in the midsagittal plane.                                                                                             | Epiglottis Base                  | (epBse)      |
| 5                          | The most posterior point on the pharyngeal wall at the level of the epiglottis base in the midsagittal plane.                                                                                                                              | Epiglottis Base Posterior        | (epBsePo)    |
| 6                          | Most inferior point of the left piriform sinus.                                                                                                                                                                                            | Piriform Sinus Inferior Left     | (PSInL)      |
| 7                          | Most inferior point of the right piriform sinus.                                                                                                                                                                                           | Piriform Sinus Inferior Right    | (PSInR)      |
| 8                          | The midpoint (most 'curved' point) of the left aryepiglottic fold . Approximately halfway between the base and tip of the epiglottis.                                                                                                      | Piriform Sinus Superior Left     | (PSSuL)      |
| 9                          | The midpoint (most 'curved' point) of the right aryepiglottic fold. Approximately halfway between the base and tip of the epiglottis.                                                                                                      | Piriform Sinus Superior Right    | (PSSuR)      |
| 10                         | Most inferior point on the left vallecula.                                                                                                                                                                                                 | Vallecula Inferior Left          | (VaInL)      |
| 11                         | Most inferior point on the right vallecula.                                                                                                                                                                                                | Vallecula Inferior Right         | (VaInR)      |
| 12                         | Most anterior point of the anterior pharyngeal wall at the level of the velum tip as visualized in the midsagittal plane.                                                                                                                  | Velum Anterior                   | (VeAn)       |
| 13                         | Most posterior point of the posterior pharyngeal wall at the level of the velum tip, as visualized in the midsagittal plane.                                                                                                               | Velum Posterior                  | (VePo)       |
| 14                         | Midpoint between VeAn and VePo (landmarks 12 and 13 as defined above). Midpoint was calculated based on VePo and VeAn landmark coordinates.                                                                                                | Midpoint between VeAn and VePo   | (MidVe)      |
| 15                         | The most supero-posterior point of the velum.                                                                                                                                                                                              | Velum Back                       | (VeBa)       |
| 16                         | The inferior tip of the velum.                                                                                                                                                                                                             | Velum End                        | (VeEnd)      |
| 17                         | The most anterior point of the pharynx at the level of the PNS in the axial plane as guided by the midsagittal plane of the pharynx.                                                                                                       | Nasopharynx Anterior             | (NpxAn)      |
| 18                         | Most posterior point of the pharyngeal wall at the level of the PNS in the axial plane as guided by the midsagittal plane of the pharynx.                                                                                                  | Nasopharynx Posterior            | (NpxPo)      |
| 19                         | Midpoint between NpxAn and NpxPo (landmarks 17 and 18). Midpoint was calculated based on NpxAn and NpxPo landmark coordinates).                                                                                                            | Midpoint between NpxAn and NpxPo | (NpxMid)     |
| 20                         | Landmark placed on the soft tissue between the posterior vomer bone and the nasal crest of the palatine bone.                                                                                                                              | Posterior Nasal Septum           | (NasalS)     |
| <b>Reference Landmarks</b> |                                                                                                                                                                                                                                            |                                  |              |
| 21                         | The most anterior point of the Anterior Nasal Spine.                                                                                                                                                                                       | Anterior Nasal Spine             | (ANS)        |
| 22                         | The most posterior point of the Posterior Nasal Spine.                                                                                                                                                                                     | Posterior Nasal Spine            | (PNS)        |
| <b>Maxilla Landmarks</b>   |                                                                                                                                                                                                                                            |                                  |              |
| 23                         | The most postero-inferior point of the maxillary alveolar bone in the midsagittal plane (landmark location is between the first incisors)                                                                                                  | Alveolar bone of incisor         | (ABI)        |
| 24                         | The most posterior point of the incisive canal in the midsagittal plane of the maxilla.                                                                                                                                                    | Posterior edge of incisive canal | (PIC)        |
| 25                         | The intersection between the transverse palatine suture and the median palatine suture.                                                                                                                                                    | Palatine Sutures intersection    | (PALS)       |
| 26                         | Midpoint between PIC and PALS (landmarks 24 and 25) along the median palatine suture on the maxilla. Coordinates calculated based on PIC and PALS landmark coordinates x, y, z.                                                            | Maxilla midpoint                 | (MMax)       |

251 Description/definition of the 26 anatomic landmarks (pharynx, reference, and maxilla), listed  
 252 from the inferior to the superior regions of the airway as displayed in Figure 1. Landmark  
 253 placement entailed use of multiplanar views (at least two of the sagittal, axial and coronal planes,

254 or all three) for accuracy. These landmarks were used in defining study variables and extracting  
255 the quantitative measurements of the upper airway as specified in Table 5.

256



257 **Table 5. All upper airway variables examined.**

| Measure-<br>ment #           | Variable Description                                                                                                                                                                                                                       | Variable Name                                | (Abbreviation)       |
|------------------------------|--------------------------------------------------------------------------------------------------------------------------------------------------------------------------------------------------------------------------------------------|----------------------------------------------|----------------------|
| <b><i>Nasopharynx</i></b>    |                                                                                                                                                                                                                                            |                                              |                      |
| 1                            | Orthogonal volume of the region bound by the intersections of the centerline with the palatal plane (ANS-PNS) superiorly and inferiorly with the tip of the velum.                                                                         | Nasopharynx Volume                           | Nasopharynx          |
| 2                            | The curvilinear segment length along the centerline of the Nasopharynx Volume.                                                                                                                                                             | Nasopharynx Length                           | NasopharynxL         |
| 3                            | Cross sectional area (CSA) of the superior border of Nasopharynx Volume.                                                                                                                                                                   | Nasopharynx Area                             | NasopharynxArea      |
| 4                            | The distance between the most anterior and posterior points along the midline of the superior border of the Nasopharynx Volume.                                                                                                            | Nasopharynx Anterior-<br>Posterior Distance  | NasopharynxAPDist    |
| 5                            | The distance between the most lateral left and right points along the midline of the superior border of the Nasopharynx Volume.                                                                                                            | Nasopharynx Width                            | NasopharynxWidth     |
| <b><i>Oropharynx</i></b>     |                                                                                                                                                                                                                                            |                                              |                      |
| 6                            | Orthogonal volume of the region bounded superiorly by the tip of the velum, and inferiorly by the midpoint of the aryepiglottic folds.                                                                                                     | Oropharynx Volume                            | Oropharynx           |
| 7                            | The curvilinear segment length along the centerline of the Oropharynx Volume.                                                                                                                                                              | Oropharynx Length                            | OropharynxL          |
| 8                            | CSA of the superior border of the Oropharynx Volume.                                                                                                                                                                                       | Oropharynx Area                              | OropharynxArea       |
| 9                            | The distance between the most anterior and posterior points along the midline of the superior border of the Oropharynx Volume.                                                                                                             | Oropharynx Anterior-<br>Posterior Distance   | OropharynxAPDist     |
| 10                           | The distance between the most lateral left and right points along the midline of the superior border of the Oropharynx Volume.                                                                                                             | Oropharynx Width                             | OropharynxWidth      |
| <b><i>Laryngopharynx</i></b> |                                                                                                                                                                                                                                            |                                              |                      |
| 11                           | Orthogonal volume of the region bounded by the orthogonal planes where the centerline intersects superiorly with the tip of the midpoint of the aryepiglottic folds, and inferiorly with the glottis.                                      | Laryngopharynx Volume                        | Laryngopharynx       |
| 12                           | The curvilinear segment length along the centerline of the Laryngopharynx Volume.                                                                                                                                                          | Laryngopharynx Length                        | LaryngopharynxL      |
| 13                           | CSA of the superior orthogonal border/plane of Laryngopharynx Volume.                                                                                                                                                                      | Laryngopharynx Area                          | LaryngopharynxArea   |
| 14                           | The distance between the most anterior and posterior points along the midline of the most superior border of the Laryngopharynx Volume.                                                                                                    | Laryngopharynx Antero-<br>posterior Distance | LaryngopharynxAPDist |
| 15                           | The distance between the most lateral left and right points along the midline of the most superior border of the Laryngopharynx Volume.                                                                                                    | Laryngopharynx Width                         | LaryngopharynxWidth  |
| <b><i>Pharynx</i></b>        |                                                                                                                                                                                                                                            |                                              |                      |
| 16                           | Orthogonal volume of the region bounded superiorly by the intersections of centerline with the palatal plane, and inferiorly by the glottis.                                                                                               | Total Pharynx Volume                         | PharynxVolume        |
| 17                           | The curvilinear length along the centerline of the Pharynx Volume.                                                                                                                                                                         | Pharynx Length                               | PharynxLength        |
| 18                           | CSA of the superior border/plane of the Subglottal Volume.                                                                                                                                                                                 | Glottis Area                                 | GlottisArea          |
| 19                           | The distance between the most anterior and posterior points along the midline of the most superior border of the Subglottal Volume.                                                                                                        | Glottis Anterior-Posterior<br>Distance       | GlottisAPDist        |
| 20                           | The distance between the most lateral left and right points along the midline of the most superior border of the Subglottal Volume.                                                                                                        | Glottis Width                                | GlottisWidth         |
| 26                           | The curvilinear distance extending from the posterior aspect of the maxillary incisor teeth (ABI, landmark 23) through the oral and pharyngeal cavities to the level of the glottis. (i.e. traditional VTL measures starting at incisors). | Vocal Tract Length <sub>i</sub>              | VTL <sub>i</sub>     |
| 27                           | Curvilinear length of the velum from the PNS to the tip of the velum (VeEnd).                                                                                                                                                              | Velum Length                                 | Velum Length         |
| 28                           | Length of the left piriform sinus measured as the 3D distance from the midpoint of the left aryepiglottic fold and the most inferior aspect of the left piriform sinus.                                                                    | Piriform Sinus Length Left                   | PSLengthLeft         |
| 29                           | Length of the right piriform sinus measured as the 3D distance from the midpoint of the right aryepiglottic fold and the most inferior aspect of the right piriform sinus.                                                                 | Piriform Sinus Length<br>Right               | PSLengthRight        |
| 30                           | Average length of the piriform sinus (average of PSLengthLeft and PSLengthRight if both exist, or the length of either if one is missing).                                                                                                 | Average Piriform Sinus<br>Length             | AveragePSLength      |
| <b><i>Subglottal</i></b>     |                                                                                                                                                                                                                                            |                                              |                      |
| 21                           | Orthogonal volume of the region bounded superiorly by the glottis, and inferiorly by the opening of the trachea.                                                                                                                           | Subglottal Volume                            | Subglottal           |
| 22                           | The curvilinear segment length along the centerline of the Subglottal Volume                                                                                                                                                               | Subglottal Length                            | SubglottalL          |
| 23                           | CSA of the most inferior border of the Subglottal Volume, below the cricoid bone at the level of the first tracheal ring.                                                                                                                  | Trachea Area                                 | TracheaArea          |
| 24                           | The distance between the most anterior and posterior points along the midline of the most inferior border of the Subglottal Volume.                                                                                                        | Trachea Anterior-<br>Posterior Distance      | TracheaAPDist        |
| 25                           | The distance between the most lateral left and right points along the midline of the most inferior border of the Subglottal Volume.                                                                                                        | Trachea Width                                | TracheaWidth         |

258 The 30 upper airway variables examined. Measurements extracted for each region include: the  
259 orthogonal volume, curvilinear/centerline volume-length, the orthogonal superior or inferior  
260 cross-sectional area (CSAs) of each of the subregions, as well as the anterior-posterior distance  
261 (APDist) and lateral width (Width) of each CSAs. All planar measurements are orthogonal to  
262 the centerline. The sum of the nasopharynx, oropharynx and laryngopharynx subregions was  
263 used to calculate pharynx volume and pharynx length (measurements 1-to-25). See text for  
264 additional vocal tract (VT) measurements (measurements 26-30).

265

266

#### 267 **d. Pharynx centerline and data extraction protocol**

268 A semi-automatic, centerline-based data extraction pipeline was developed to extract quantitative  
269 measurements from the 3D pharynx in MATLAB (The MathWorks, Natick, MA). First, the  
270 built-in marching-cube algorithm in MATLAB was used to generate 3D meshes of the pharynx  
271 model to serve as input to the pipeline (Lorensen & Cline, 1987). This pipeline adapted the  
272 implicit fairing diffusion method to smooth the 3D pharynx meshes iteratively while preserving  
273 the intrinsic geometric properties (Desbrun et al., 1999). Next, a level-contour-based centroid-  
274 extraction method was applied on the smoothed pharynx, obtaining a set of coordinates along the  
275 tubular center of the pharynx (Lazarus & Verroust, 1999; Shi et al., 2008; Seo et al., 2011).  
276 These coordinates were further interpolated and smoothed with the B-spline de Boor algorithm,  
277 generating a centerline representative of the center of the airway lumen (de Boor, 1978;  
278 Hunyadi, 2010). Then, this centerline was then used as input to an in-house written script that  
279 calculated planes orthogonal (i.e., perpendicular) to the line segment formed by each centerline  
280 coordinate and its subsequent centerline coordinate. Finally, the intersections between the  
281 orthogonal planes and the 3D meshes were then extracted as boundary vertices. With the  
282 boundary vertices, cross sectional areas (CSAs) as well as additional variable measurements

283 were calculated along the centerline. See Fig 2 for an illustration of the 3D pharynx model and  
284 the cross sections.

285

## 286 **e. Variable measurements**

287 A total of 30 airway variables, as listed and defined in Table 5, were measured by the above-  
288 described protocol using planes orthogonal to the centerline. The variables extracted are  
289 described below and include overall pharyngeal length and volume, modified vocal tract length  
290 (VTLength<sub>i</sub>), velum length, and piriform sinuses length measurements, as well as measurements  
291 from the following four subregions: (i) Nasopharynx, (ii) Oropharynx, (iii) Laryngopharynx, and  
292 (iv) Subglottal. See Fig 1. Each subregion was isolated using its respective ‘landmark-derived  
293 planes’ orthogonal to the centerline using the following boundary definitions: The nasopharynx  
294 region was defined as an orthogonal volume bound by the intersection of the centerline with the  
295 palatal plane –formed by the anterior nasal spine (ANS) and posterior nasal spine (PNS)  
296 landmarks– superiorly, and with the tip of the velum inferiorly. The oropharynx region was  
297 defined as an orthogonal volume bound by the orthogonal planes at the tip of the velum  
298 superiorly, and by the aryepiglottic fold inferiorly. The laryngopharynx region, that includes the  
299 piriform sinuses, was defined as the orthogonal volume bound by the orthogonal planes at the  
300 midpoint of the aryepiglottic folds superiorly (the most curved point at approximate halfway  
301 between the base and tip of the aryepiglottic folds), and by the glottis inferiorly. The subglottal  
302 region was bound superiorly by the inferior boundary of the laryngopharynx region, and  
303 inferiorly by the first axial slice displaying the first tracheal ring. The first tracheal ring was used  
304 as a guide to the inferior border of the cricoid cartilage as the unossified cricoid cartilages in  
305 pediatric cases was difficult to delineate on the CT images (Hudgins et al., 1997).

306 Measurements extracted, as defined in Table 5, included for each region: the orthogonal  
307 volume, curvilinear/centerline volume-length, the orthogonal superior or inferior cross-sectional  
308 areas (CSAs, five total) of each of the subregions, as well as the anterior-posterior distance  
309 (APDist) and lateral width (Width) of each CSAs. The sum of the nasopharynx, oropharynx and  
310 laryngopharynx subregions was used to calculate pharynx volume and pharynx length (Table 5,  
311 measurements 1-to-25). Additional vocal tract (VT) measurements (Table 5, measurements 26-  
312 30) included: Vocal Tract Length<sub>incisor</sub> (VTL<sub>i</sub>); calculated as the curvilinear distance extending  
313 from the posterior border of the maxillary incisor (seen as the most anterior landmark in Fig 1) to  
314 the glottis, representing the vocal tract portion of the upper airway starting at the incisor i.e.  
315 excluding the lip and teeth region. Velum length; calculated as the curvilinear distance extending  
316 from the PNS to the tip of the velum (VeEnd). Piriform sinus length (PSLength); left, right, and  
317 average PSLength, measured using the defined anatomical landmarks (PSSuL/R and PSInL/R).  
318

## 319 **f. Statistical analysis**

320 All statistical analyses were performed in R. A linear mixed-effect model was used to capture  
321 sex-specific growth in young children and allow for developmental comparison with adult  
322 pharyngeal morphology. This model, using the lmerTest package for mixed-effects in R,  
323 accounted for the repeat scans included in the dataset from individuals with multiple visits. The  
324 model was specified as follows:

325

$$326 \hat{y} = \beta_0 + \beta_1 Sex + \beta_2 Adult + \beta_3 Sex \cdot Adult + \beta_4 PediatricAge +$$
$$327 \beta_5 Sex \cdot PediatricAge + \alpha_i$$

328 with “Adult” a dummy variable for adult subjects, “PediatricAge” the age for non-adult subjects  
329 (0 for adults), and  $\alpha_i$  a random per-subject effect.

330 Outliers were first excluded using the model, by removing data points with residuals  
331 exceeding 2.576 of standard deviation, as described in (Vorperian et al., 2009; Vorperian et al.,  
332 2011). The model was then refitted on log-scale for each of the variables to assess for growth  
333 trends and sex differences.

334 Likelihood ratio test (LRT) was conducted to assess overall age effect in the first five years of  
335 life. To assess sex-differences, Wald test was performed at three time points: age-groups < 1  
336 year, 5-years and adults. Tests were conducted at a nominal significance level of  $\alpha = 0.05$ ; in  
337 Table 6, significance at a Bonferroni corrected level was also indicated. Finally, using point  
338 estimate of modeled means, percent growth at age 5-years was calculated using data at age-  
339 group < 1 year, and adults for the purpose of gaining insight on upper airway growth type as  
340 described by Scammon (1930, p. 187) Scammon determined two primary postnatal growth  
341 types, neural and general growth types, or their combination, to characterize growth of head and  
342 neck structures. Furthermore, he noted that while all primary growth types are characterized by a  
343 period of rapid growth during infancy, by early childhood neural growth type achieves greater  
344 than two-thirds of the adult size, while somatic growth type barely achieves a quarter of the adult  
345 size (Scammon, 1930, pp. 185-194).

346

## 347 **Results**

348 Measurements extracted for males and females are displayed in Figs 3A-C for each pharyngeal  
349 subregion, Fig 3D for the entire pharynx, and Fig 3E for the subglottal region with sex-specific  
350 linear fits and confidence intervals at age <1 year, 5-years, and adults. The plots also include a

351 second y-axis depicting the percent growth of adult size. Statistical analysis results are also  
352 summarized numerically in Table 6. Significance at the .05, < .01, < .001, and Bonferroni  
353 corrected < .0004 levels are marked with one, two, three and four asterisks respectively in Fig 3  
354 and Table 6.

355

356 **Fig 3. Measurements extracted for each pharyngeal region: 3A. Nasopharynx; 3B.**  
357 **Oropharynx; 3C. Laryngopharynx; 3D. Pharynx (supraglottal); 3E. Subglottal.**

358 Measurements extracted for each region 3A to 3E is depicted in top panel image on left with  
359 measurements as defined in Table 5 and consisting of: Top panel; the orthogonal volume, and the  
360 curvilinear/centerline volume-length; bottom panel; the orthogonal superior or inferior cross-  
361 sectional area (CSA), its anterior-posterior distance (APDist), and lateral width (Width). Plots  
362 include measurements for male in blue filled square symbols, and for female in red open circle  
363 symbols. Pediatric data include linear fits for males (blue solid line) and females (red dashed  
364 line). Point estimate of modeled means and confidence intervals are plotted for adult data, and at  
365 ages 0 and 5 years respectively for males (purple) and female (magenta). The second Y-axis  
366 reflects the percent growth for males (blue, inwards tick orientation) and females (black,  
367 outwards tick orientation). Significance for sex differences at birth, age five and/or adults are  
368 denoted with asterisk above the interval plots using the nominal  $\alpha \leq 0.05$  level; the numeric p  
369 values are displayed in Table 6.

370

371 **Fig 3B. Measurements extracted for the oropharyngeal region.** Refer to Fig 3 caption for  
372 symbol, fit and measurements layout specifications.

373

374 **Fig 3C. Measurements extracted for the laryngopharyngeal region.** Refer to Fig 3 caption  
375 for symbol, fit and measurements layout specifications.

376

377 **Fig 3D. Measurements for the supraglottal pharyngeal region.** Refer to Fig 3 caption for  
378 symbol, fit and measurements layout specifications.

379

380 **Fig 3E. Measurements extracted for the subglottal region.** Refer to Fig 3 caption for symbol,  
381 fit and measurements layout specifications.

382

383 **Table 6. Likelihood ratio test and Wald test results.**

| Measurements<br>Types                                | Variable             | Age Effect<br>LRT |         | Sex Effect - Wald Test |          |         |                |        |          |          | Percent Growth at<br>Age 5 |       |        |
|------------------------------------------------------|----------------------|-------------------|---------|------------------------|----------|---------|----------------|--------|----------|----------|----------------------------|-------|--------|
|                                                      |                      | <i>p value</i>    |         | <i>p value</i>         |          |         | <i>p value</i> |        |          |          |                            |       |        |
|                                                      |                      | Pediatric         | M       | F                      | Age <1   | M       | F              | Age 5  | M        | F        | Adult                      | M     | F      |
| <b>Volume<br/>(mm<sup>3</sup>)</b>                   | Nasopharynx          | 0.0006 ***        | 807.28  | 927.40                 | 0.6125   | 2453.77 | 2105.76        | 0.5155 | 5221.76  | 4255.25  | 0.3591                     | 51.96 | 47.51  |
|                                                      | Oropharynx           | 0.0000 ****       | 304.42  | 185.39                 | 0.1546   | 879.79  | 1338.51        | 0.1570 | 7460.16  | 4927.30  | 0.1485                     | 22.28 | 47.01  |
|                                                      | Laryngopharynx       | 0.0000 ****       | 265.04  | 296.85                 | 0.6296   | 1064.72 | 1188.46        | 0.5845 | 6168.93  | 4215.44  | 0.0464 *                   | 31.79 | 41.35  |
|                                                      | PharynxVolume        | 0.0000 ****       | 1450.67 | 1480.53                | 0.9229   | 4597.95 | 5257.92        | 0.4566 | 19742.95 | 13573.47 | 0.0288 *                   | 33.80 | 48.10  |
|                                                      | Subglottal           | 0.0000 ****       | 132.25  | 154.83                 | 0.3167   | 670.82  | 722.98         | 0.5761 | 5998.06  | 3463.51  | 0.0000 ****                | 27.99 | 36.94  |
| <b>Volume<br/>Segment<br/>Length<br/>(mm)</b>        | NasopharynxL         | 0.0010 **         | 20.68   | 24.28                  | 0.0800   | 30.15   | 29.74          | 0.8622 | 35.92    | 32.71    | 0.2105                     | 62.14 | 64.75  |
|                                                      | OropharynxL          | 0.0004 ****       | 6.26    | 3.80                   | 0.0635   | 10.35   | 15.14          | 0.0972 | 37.05    | 30.24    | 0.3612                     | 13.30 | 42.89  |
|                                                      | LaryngopharynxL      | 0.0017 **         | 13.11   | 13.32                  | 0.8246   | 16.75   | 16.97          | 0.8364 | 27.60    | 22.01    | 0.0002 ****                | 25.12 | 41.93  |
|                                                      | PharynxLength        | 0.0000 ****       | 40.54   | 42.09                  | 0.4439   | 58.20   | 61.78          | 0.1530 | 101.65   | 84.68    | 0.0000 ****                | 28.90 | 46.23  |
|                                                      | SubglottalL          | 0.0000 ****       | 7.47    | 10.07                  | 0.0106 * | 14.66   | 15.12          | 0.7570 | 28.00    | 26.44    | 0.5538                     | 35.04 | 30.86  |
| <b>Area<br/>(mm<sup>2</sup>)</b>                     | NasopharynxArea      | 0.0868            | 54.65   | 39.11                  | 0.2446   | 74.51   | 83.92          | 0.6260 | 248.52   | 218.61   | 0.5852                     | 14.80 | 34.08  |
|                                                      | OropharynxArea       | 0.0434 *          | 56.37   | 53.05                  | 0.8100   | 100.62  | 94.33          | 0.7651 | 171.08   | 140.44   | 0.3344                     | 45.28 | 53.18  |
|                                                      | LaryngopharynxArea   | 0.0014 **         | 48.66   | 56.11                  | 0.5462   | 111.26  | 123.17         | 0.6120 | 344.29   | 276.37   | 0.2512                     | 30.85 | 39.50  |
|                                                      | GlottisArea          | 0.0000 ****       | 11.28   | 5.65                   | 0.0598   | 42.56   | 49.90          | 0.6103 | 121.90   | 74.74    | 0.1079                     | 41.20 | 74.77  |
|                                                      | TracheaArea          | 0.0000 ****       | 23.20   | 24.41                  | 0.6389   | 53.31   | 51.56          | 0.7178 | 238.62   | 150.92   | 0.0000 ****                | 23.37 | 30.49  |
| <b>Anterior-<br/>Posterior<br/>Distance<br/>(mm)</b> | NasopharynxAPDist    | 0.2087            | 5.41    | 3.61                   | 0.0793   | 5.89    | 6.07           | 0.8801 | 14.47    | 12.40    | 0.4132                     | 5.37  | 27.93  |
|                                                      | OropharynxAPDist     | 0.0094 **         | 6.47    | 7.49                   | 0.4237   | 10.44   | 12.38          | 0.2730 | 12.82    | 11.55    | 0.4807                     | 62.44 | 120.23 |
|                                                      | LaryngopharynxAPDist | 0.3702            | 7.22    | 8.23                   | 0.3171   | 8.91    | 9.03           | 0.8998 | 14.48    | 12.69    | 0.2206                     | 23.26 | 18.01  |
|                                                      | GlottisAPDist        | 0.0000 ****       | 5.71    | 5.23                   | 0.2835   | 9.78    | 10.48          | 0.3147 | 19.93    | 14.35    | 0.0000 ****                | 28.66 | 57.59  |
|                                                      | TracheaAPDist        | 0.0001 ****       | 5.47    | 5.27                   | 0.5954   | 7.52    | 6.85           | 0.1295 | 15.97    | 12.30    | 0.0000 ****                | 19.48 | 22.50  |
| <b>Width<br/>(mm)</b>                                | NasopharynxWidth     | 0.0086 **         | 11.37   | 10.35                  | 0.5211   | 16.12   | 16.78          | 0.7464 | 22.31    | 23.03    | 0.7880                     | 43.42 | 50.69  |
|                                                      | OropharynxWidth      | 0.0163 *          | 8.31    | 8.81                   | 0.7408   | 14.65   | 12.61          | 0.3252 | 19.60    | 15.60    | 0.1167                     | 56.20 | 55.91  |
|                                                      | LaryngopharynxWidth  | 0.0000 ****       | 6.39    | 5.75                   | 0.3324   | 10.35   | 12.00          | 0.1166 | 20.99    | 18.35    | 0.1341                     | 27.11 | 49.58  |
|                                                      | GlottisWidth         | 0.0000 ****       | 2.58    | 1.76                   | 0.1098   | 6.23    | 6.73           | 0.7073 | 8.92     | 7.16     | 0.2674                     | 57.58 | 92.06  |
|                                                      | TracheaWidth         | 0.0000 ****       | 5.20    | 5.38                   | 0.6007   | 8.52    | 8.75           | 0.6373 | 17.64    | 14.67    | 0.0005 ***                 | 26.72 | 36.27  |
| <b>VT<br/>Additional<br/>Length<br/>(mm)</b>         | VTLength             | 0.0000 ****       | 78.88   | 76.92                  | 0.4097   | 108.35  | 111.13         | 0.3312 | 159.81   | 141.01   | 0.0000 ****                | 36.42 | 53.38  |
|                                                      | VelumLength          | 0.0000 ****       | 25.19   | 25.13                  | 0.9533   | 33.61   | 34.40          | 0.5550 | 42.41    | 38.92    | 0.0206 *                   | 48.85 | 67.22  |
|                                                      | PSLengthLeft         | 0.3470            | 6.13    | 5.97                   | 0.9279   | 9.01    | 8.26           | 0.6893 | 17.68    | 14.13    | 0.2472                     | 24.99 | 28.02  |
|                                                      | PSLengthRight        | 0.1376            | 6.01    | 5.79                   | 0.8925   | 10.18   | 9.41           | 0.7050 | 20.74    | 15.64    | 0.1262                     | 28.35 | 36.69  |
|                                                      | AveragePSLength      | 0.0768            | 5.70    | 5.95                   | 0.8571   | 9.80    | 8.76           | 0.5465 | 19.33    | 14.94    | 0.1376                     | 30.09 | 31.31  |

384 Likelihood ratio test (LRT) results for age effect, and sex-effect using the Wald test at age <1 year, 5 years, and adults. Significant  
 385 differences are denoted with asterisk (\* = <.05; \*\*=<.01; \*\*\* = <.001; \*\*\*\*= <.0004 Bonferroni corrected value). Also, percent of



386 adult size at age 5 years (final column) for each of the 30 variables as listed by measurement type (column 1), and airway sub-regions  
387 (column 2). Percentages are based on the point estimate of modelled means, see Fig 3 for 95% confidence intervals. The regions are  
388 listed superior to inferior with supra-laryngeal (above glottis) measurements listed first. Refer to Figure 1 to visualize variables and  
389 subregions; and Table 5 for variable definitions.

## 390 **a. Age Effect**

391 As expected, likelihood ratio test results confirmed that all airway measurements for total and  
392 subregion volume, length (including  $VTL_i$ ), and width (lateral) exhibited statistically significant  
393 growth in size during the first five years of life (< 1 year to 5-years) (Table 6). Also, four of the  
394 five CSAs examined displayed significant growth in size, except for the CSA at the level of the  
395 nasopharynx ( $p = 0.0868$ ). Similarly, the linear anterior-posterior distance (APDist)  
396 measurements displayed significant growth except for the two measurements at the level of the  
397 nasopharynx and the laryngopharynx ( $p = 0.2087$  and  $0.3702$  respectively). Limited growth was  
398 noted for average piriform sinus length (AveragePSLength;  $p = 0.0768$ ), but growth in Velum  
399 Length was highly significant ( $p < .0001$ ).

400 Compared to the mature adult airway, both male and female pediatric upper airway  
401 dimensions by age 5-years were significantly smaller (with higher percent growth in females  
402 than males as discussed below). However, one exception was the oropharynx anterior-posterior  
403 distance (APDist) and to some extent oropharynx width, where by age 5, children had essential  
404 attained their adult size (see Fig 3).

405

## 406 **b. Sex Effect**

407 The Wald test performed on pediatric data indicated that only subglottal length (SubglottalL)  
408 showed significance ( $p = .0106$ ) at age <1 year with females' mean length being longer than  
409 males (see Table 7 mean (s.d.); M=8.06 (3.02) mm; F=10.56 (3.17) mm). No statistical  
410 significance was detected for any other variable at age-group <1 year or age-group 5-years.  
411 However, sex differences – though not significant – were noted at age group < 1 year in the  
412 volume-length of the nasopharynx ( $p = 0.08$ ) and the oropharynx ( $p = 0.0635$ ) subregions with

413 females having longer measurement than males; also, differences in nasopharynx APDist ( $p =$   
414  $0.0793$ ) and glottis area ( $p = 0.0598$ ) with males having larger measurements than females. By  
415 age 5-years, insignificant differences in the volume-length of the oropharynx subregion was  
416 noted ( $p = 0.0972$ ) with females having slightly longer measurements than males (see Table 7;  
417  $M=10.43$  (3.57) mm;  $F=14.28$  (7.21) mm).

418 As for adults, sexual dimorphism was highly significant for overall pharynx length and  
419  $VTL_i$  ( $p < .0001$ ;  $M=161.06$  (7.03) mm;  $F=141.14$  (6.53) mm), and significant for pharynx  
420 volume ( $p < .05$ ;  $M= 53.73$  (16.43)  $\text{cm}^3$ ;  $F= (44.84$  (15.17)  $\text{cm}^3$ ), with males having larger  
421 measurements than females (see Tables 6 and 7). Sexual dimorphism was also present in  
422 laryngopharynx length ( $p < .0004$ ) and volume ( $p < .05$ ), as well as subglottal volume ( $p$   
423  $<.0004$ ), with highly significant differences in Glottis APDist ( $p < .0004$ ) superiorly and CSA at  
424 tracheal ring inferiorly ( $p <.0004$ ; including differences in tracheal APDist ( $p <.0004$ ) and width  
425  $p=.0005$ ) with males having larger measurements than females.

426

427 **Table 7. Age-specific mean (standard deviation) of the different measurement types for**  
 428 **each pharyngeal region.**

| Types                            | Variables            | Sex            | Age Groups       |                  |                   |                   |                   |                    |
|----------------------------------|----------------------|----------------|------------------|------------------|-------------------|-------------------|-------------------|--------------------|
|                                  |                      |                | <1               | 1-1.9            | 2-2.9             | 3-3.9             | 4-4.9             | 20-30              |
| Volume (mm <sup>3</sup> )        | Nasopharynx          | M              | 1027.75 (681.71) | 1082.45 (521.43) | 2184.46 (879.28)  | 1709.06 (629.70)  | 2097.12 (699.82)  | 5372.79 (1543.29)  |
|                                  |                      | F              | 1022.04 (853.53) | 1488.75 (335.17) | 2100.80 (1073.60) | 1456.65 (640.11)  | 2232.27 (588.07)  | 4483.83 (1516.60)  |
|                                  | Oropharynx           | M              | 380.64 (140.79)  | 353.09 (162.78)  | 727.05 (335.33)   | 1021.23 (751.86)  | 754.96 (614.13)   | 8025.12 (2397.84)  |
|                                  |                      | F              | 299.93 (250.23)  | 482.34 (304.17)  | 613.47 (280.78)   | 796.34 (266.50)   | 1359.76 (1123.66) | 5179.36 (1811.89)  |
|                                  | Laryngopharynx       | M              | 412.27 (154.59)  | 333.90 (96.72)   | 607.52 (405.70)   | 866.48 (380.82)   | 868.67 (317.73)   | 6588.71 (2894.12)  |
|                                  |                      | F              | 328.35 (179.26)  | 571.61 (174.32)  | 666.87 (321.22)   | 873.74 (489.16)   | 1009.18 (285.87)  | 4262.30 (681.45)   |
|                                  | PharynxVolume        | M              | 1820.66 (823.81) | 1769.44 (621.23) | 3519.03 (1227.26) | 3596.77 (1582.71) | 3720.76 (1282.02) | 19986.62 (3401.72) |
|                                  |                      | F              | 1650.32 (963.36) | 2542.70 (573.50) | 3381.15 (1451.68) | 3552.66 (1430.01) | 4601.21 (881.81)  | 13925.49 (3407.88) |
| Subglottal                       | M                    | 181.69 (88.19) | 231.53 (67.30)   | 316.81 (93.86)   | 396.33 (133.49)   | 617.19 (203.74)   | 6023.72 (1161.30) |                    |
|                                  | F                    | 179.72 (47.69) | 264.70 (34.89)   | 321.03 (80.81)   | 526.63 (107.58)   | 533.77 (93.47)    | 3572.99 (979.31)  |                    |
| Volume Segment Length (mm)       | NasopharynxL         | M              | 22.19 (4.35)     | 23.12 (5.24)     | 26.32 (5.36)      | 27.61 (5.13)      | 27.88 (3.48)      | 36.13 (4.16)       |
|                                  |                      | F              | 22.39 (4.64)     | 30.18 (2.29)     | 29.50 (4.07)      | 26.26 (3.37)      | 29.01 (2.32)      | 33.03 (4.65)       |
|                                  | OropharynxL          | M              | 6.71 (1.87)      | 7.95 (2.02)      | 9.34 (4.08)       | 9.58 (5.01)       | 10.43 (3.57)      | 38.57 (8.49)       |
|                                  |                      | F              | 7.57 (6.03)      | 5.72 (3.70)      | 6.51 (1.57)       | 11.32 (3.32)      | 14.28 (7.21)      | 30.79 (6.18)       |
|                                  | LaryngopharynxL      | M              | 13.52 (2.14)     | 14.81 (1.67)     | 14.14 (2.25)      | 15.65 (1.40)      | 16.56 (1.75)      | 27.52 (2.79)       |
|                                  |                      | F              | 13.79 (2.92)     | 14.33 (2.28)     | 15.31 (1.62)      | 15.94 (2.14)      | 16.53 (2.69)      | 22.08 (1.81)       |
|                                  | PharynxLength        | M              | 42.42 (5.27)     | 45.75 (5.42)     | 49.09 (4.24)      | 52.85 (6.31)      | 54.80 (4.26)      | 101.83 (6.48)      |
|                                  |                      | F              | 43.59 (6.95)     | 50.22 (3.20)     | 51.32 (3.15)      | 53.53 (4.60)      | 59.81 (4.55)      | 84.87 (6.16)       |
| SubglottalL                      | M                    | 8.06 (3.02)    | 9.74 (1.85)      | 12.41 (3.18)     | 10.96 (2.15)      | 14.20 (2.62)      | 28.17 (2.69)      |                    |
|                                  | F                    | 10.56 (3.17)   | 11.97 (1.97)     | 11.68 (2.19)     | 14.40 (1.91)      | 13.68 (2.01)      | 26.65 (3.68)      |                    |
| Area (mm <sup>2</sup> )          | NasopharynxArea      | M              | 59.01 (22.48)    | 58.16 (24.12)    | 93.06 (39.75)     | 60.69 (31.72)     | 89.03 (41.34)     | 256.15 (92.03)     |
|                                  |                      | F              | 47.54 (20.78)    | 52.03 (18.20)    | 71.78 (31.60)     | 67.30 (34.31)     | 99.45 (40.13)     | 227.33 (69.79)     |
|                                  | OropharynxArea       | M              | 67.66 (22.94)    | 51.51 (23.51)    | 118.30 (54.47)    | 94.23 (51.27)     | 87.63 (21.59)     | 176.34 (42.19)     |
|                                  |                      | F              | 51.52 (32.64)    | 96.06 (13.02)    | 79.93 (40.44)     | 74.60 (19.79)     | 91.80 (14.02)     | 145.07 (41.00)     |
|                                  | LaryngopharynxArea   | M              | 62.05 (22.29)    | 53.06 (19.45)    | 93.10 (44.07)     | 117.89 (49.90)    | 81.66 (33.04)     | 355.86 (78.68)     |
|                                  |                      | F              | 55.90 (24.64)    | 92.19 (12.97)    | 103.54 (31.96)    | 93.93 (28.32)     | 123.42 (53.04)    | 278.90 (39.83)     |
|                                  | GlottisArea          | M              | 19.29 (5.79)     | 14.66 (4.33)     | 18.23 (9.49)      | 30.01 (8.85)      | 42.59 (12.77)     | 128.42 (53.84)     |
|                                  |                      | F              | 11.58 (4.61)     | 11.88 (10.45)    | 21.27 (5.55)      | 30.63 (7.69)      | 36.82 (5.11)      | 80.05 (27.61)      |
| TracheaArea                      | M                    | 27.24 (10.18)  | 31.82 (5.90)     | 34.70 (7.73)     | 42.59 (6.76)      | 47.83 (6.40)      | 238.74 (31.36)    |                    |
|                                  | F                    | 28.22 (10.35)  | 30.88 (3.93)     | 31.71 (4.79)     | 45.02 (7.12)      | 43.96 (5.21)      | 152.23 (22.33)    |                    |
| Anterior-Posterior Distance (mm) | NasopharynxAPDist    | M              | 5.40 (2.21)      | 6.25 (2.25)      | 7.94 (3.11)       | 4.83 (1.69)       | 6.68 (2.00)       | 14.62 (4.34)       |
|                                  |                      | F              | 4.35 (1.22)      | 4.11 (0.87)      | 4.43 (1.73)       | 5.41 (2.37)       | 6.94 (3.49)       | 12.77 (3.50)       |
|                                  | OropharynxAPDist     | M              | 7.02 (2.85)      | 7.59 (3.33)      | 9.92 (2.74)       | 9.81 (4.82)       | 9.63 (2.78)       | 13.28 (3.44)       |
|                                  |                      | F              | 7.11 (1.53)      | 9.39 (1.60)      | 10.11 (1.86)      | 11.77 (2.36)      | 10.99 (3.71)      | 11.95 (3.33)       |
|                                  | LaryngopharynxAPDist | M              | 7.65 (1.47)      | 7.08 (0.74)      | 9.20 (2.96)       | 9.26 (2.20)       | 7.81 (1.23)       | 14.63 (1.80)       |
|                                  |                      | F              | 7.52 (1.37)      | 9.63 (1.95)      | 10.32 (2.58)      | 8.92 (1.23)       | 9.04 (2.85)       | 12.83 (2.03)       |
|                                  | GlottisAPDist        | M              | 7.09 (1.27)      | 6.08 (0.61)      | 7.03 (1.68)       | 8.47 (0.90)       | 9.60 (1.26)       | 19.98 (1.60)       |
|                                  |                      | F              | 5.41 (1.20)      | 6.60 (1.26)      | 7.72 (0.69)       | 8.82 (0.60)       | 9.08 (0.55)       | 14.44 (1.68)       |
| TracheaAPDist                    | M                    | 5.79 (1.07)    | 6.16 (0.85)      | 6.36 (1.23)      | 7.07 (0.69)       | 7.06 (0.72)       | 16.01 (1.21)      |                    |
|                                  | F                    | 5.75 (1.19)    | 5.45 (0.46)      | 5.74 (0.70)      | 6.81 (0.98)       | 6.40 (0.52)       | 12.33 (0.94)      |                    |
| Width (mm)                       | NasopharynxWidth     | M              | 12.54 (4.58)     | 12.16 (3.97)     | 15.64 (2.86)      | 14.66 (4.48)      | 15.73 (3.65)      | 22.50 (3.02)       |
|                                  |                      | F              | 10.90 (3.06)     | 12.84 (3.02)     | 14.23 (2.90)      | 13.82 (3.71)      | 16.99 (3.18)      | 23.27 (3.40)       |
|                                  | OropharynxWidth      | M              | 10.06 (3.98)     | 8.09 (3.56)      | 13.82 (2.63)      | 12.90 (4.34)      | 13.51 (3.42)      | 19.77 (2.85)       |
|                                  |                      | F              | 7.60 (2.29)      | 12.26 (1.51)     | 12.79 (4.53)      | 10.73 (4.15)      | 12.76 (1.20)      | 15.72 (2.15)       |
|                                  | LaryngopharynxWidth  | M              | 8.43 (1.55)      | 6.29 (1.49)      | 8.26 (1.43)       | 8.41 (1.48)       | 10.67 (2.04)      | 21.08 (2.04)       |
|                                  |                      | F              | 5.96 (1.56)      | 7.44 (1.65)      | 8.73 (1.50)       | 10.01 (1.24)      | 10.58 (2.04)      | 18.52 (2.68)       |
|                                  | GlottisWidth         | M              | 3.60 (0.79)      | 3.17 (0.94)      | 3.58 (1.28)       | 4.95 (1.54)       | 6.10 (1.21)       | 9.13 (3.02)        |
|                                  |                      | F              | 2.78 (0.47)      | 2.45 (1.81)      | 3.65 (0.67)       | 4.90 (1.01)       | 5.66 (0.76)       | 7.57 (2.50)        |
| TracheaWidth                     | M                    | 5.62 (1.37)    | 6.23 (0.49)      | 6.74 (0.96)      | 7.31 (0.83)       | 8.10 (0.49)       | 17.66 (1.18)      |                    |
|                                  | F                    | 5.57 (1.00)    | 6.63 (0.52)      | 6.63 (0.85)      | 7.76 (0.41)       | 7.89 (0.63)       | 14.72 (1.27)      |                    |
| VT Additional Length (mm)        | VTLength             | M              | 80.97 (5.11)     | 87.12 (3.85)     | 94.53 (6.37)      | 98.09 (6.00)      | 103.03 (5.02)     | 161.06 (7.03)      |
|                                  |                      | F              | 78.63 (7.79)     | 89.66 (4.34)     | 93.46 (2.80)      | 100.11 (5.99)     | 103.86 (6.34)     | 141.14 (6.53)      |
|                                  | VelumLength          | M              | 26.49 (1.46)     | 26.96 (2.40)     | 30.32 (3.54)      | 29.86 (3.32)      | 32.97 (1.15)      | 42.60 (4.21)       |
|                                  |                      | F              | 24.46 (1.72)     | 29.62 (1.73)     | 30.92 (2.29)      | 30.65 (2.01)      | 32.51 (0.83)      | 39.00 (2.67)       |
|                                  | PSLengthLeft         | M              | 6.87 (0.85)      | 6.63 (2.93)      | 8.41 (3.31)       | 8.35 (2.33)       | 8.90 (2.99)       | 17.96 (5.27)       |
|                                  |                      | F              | 5.35 (3.99)      | 10.73 (3.25)     | 8.89 (4.41)       | 8.46 (3.01)       | 8.26 (3.61)       | 14.43 (3.16)       |
|                                  | PSLengthRight        | M              | 6.84 (1.50)      | 5.69 (1.55)      | 8.54 (3.38)       | 10.49 (1.85)      | 8.76 (3.06)       | 20.71 (3.23)       |
|                                  |                      | F              | 6.47 (4.12)      | 10.93 (3.63)     | 7.65 (4.70)       | 9.30 (2.87)       | 9.34 (2.71)       | 15.81 (2.55)       |
| AveragePSLength                  | M                    | 6.53 (1.21)    | 5.75 (1.69)      | 8.47 (3.31)      | 9.26 (1.70)       | 8.82 (2.82)       | 19.33 (3.86)      |                    |
|                                  | F                    | 5.91 (4.04)    | 10.83 (3.44)     | 8.27 (4.53)      | 8.58 (3.04)       | 8.87 (2.76)       | 15.12 (2.61)      |                    |

429 Mean (standard deviation) of the different measurement types for each of the variables examined  
 430 with M/F denoting the average Male/Female measurements. Age groups as specified in Table 3.

431

432

### 433 **c. Percent Growth**

434 As displayed in second y-axes of Fig 3 plots, and listed in Table 6 (final column), percent  
435 growth assessment based on modeled point estimates, revealed that by age five-years, female  
436 upper airway measurements were closer than male measurements to the adult mature size in 26  
437 out of the 30 upper airway variables examined. (See the tabulated average data per age-group in  
438 Table 7.) Female data revealed 9 out of 30 variables to have reached over 50% of adult size  
439 nasopharynx volume-length (64.75%), nasopharynx width (50.69%), oropharynx area (53.18%),  
440 oropharynx APDist (120.23%), oropharynx width (55.91%), glottis area (74.77%), glottis  
441 APDist (57.59%), glottis width (92.05%), and  $VTL_i$  (53.38%). In contrast, males had only 5 of  
442 the 30 variables reach over 50% of the adult mature size: nasopharynx volume (51.96%),  
443 nasopharynx volume-length (62.14%), oropharynx APDist (62.44%), oropharynx width  
444 (56.20%), and glottis width (57.58%). The only 4 measurements where both male and female  
445 growth reached over 50% of their respective adult size were: nasopharynx length, oropharynx  
446 APDist, oropharynx width, and glottis width.

447

## 448 **Discussion**

449 This study addresses a void in normative data on the upper airway during the first five-years of  
450 life. After developing a protocol that controls for variables that can affect measurement accuracy  
451 (e.g., head position, sedation, threshold for airway segmentation), CT studies from 61 typically  
452 developing pediatric and 17 adults were used to quantify the multidimensional growth of the  
453 airway systematically with respect to age and sex. Our findings are novel in that, to our

454 knowledge, this is the first study that examines the birth-to 5 years age range, as compared to  
455 adults, using a comprehensive set of 2D and 3D measurements from the choanae to below the  
456 cricoid ring (opening to the trachea), including: supra- and sub-glottal volume and length, naso-  
457 oro-laryngo-pharynx subregion volume and length, each subregion's superior and inferior CSA,  
458 and their antero-posterior and transverse/width distances. Additionally, the data were collected  
459 using a protocol that included a well-defined and established threshold for airway segmentation,  
460 and a semi-automatic centerline that we developed for the extraction of accurate measurements  
461 to quantify the upper airway using the natural anatomic orientation of airflow for respiration and  
462 speech production.

463         The use of a centerline, as an added methodological consideration, is critical for  
464 obtaining accurate measurements of the airway. As summarized in Table 1, two studies (Welch  
465 et al., 2002; Chiang et al., 2012) have used a centerline to quantify the airway, but Chiang et al.  
466 (2012) is the only study to date that performed a centerline-based technique to obtain quantitative  
467 data on the growth and development of the airway. However, their measurements stopped at the  
468 level of the epiglottis, and they did not include the pre-pubertal age group.

469         The upper airway subregion dimensions are sensitive to altered head and tongue posture,  
470 particularly for 3D assessment but also for 2D measurements as Gurani et al. (2016) point out.  
471 Given the need for a valid method to classify head position of imaging studies, our laboratory  
472 first developed a reliable protocol that uses 14 landmarks to account for both head and neck  
473 positions (Miller et al., 2019b). We therefore first employed this protocol for the selection of  
474 cases with a neutral head position for inclusion in this study, then applied the centerline protocol.

475         Given all the methodological considerations we accounted for, the attrition rate of cases  
476 included in this study from the imaging studies available in our database was high. We retained

477 only 19% of the cases reviewed. Given this rigorous approach to control for positioning and  
478 other potential confounder, we expect our findings to reliably reflect typical airway growth.  
479 Furthermore, we anticipate that the inclusion of additional cases in future studies, using the  
480 above described airway data extraction protocol, will further strengthen present findings and  
481 observations.

482

### 483 **a. Age Differences**

484 Our findings reflect persistent positive increase in size for all variables examined during the first  
485 five years of life for all measurements in all subregions as displayed in Fig 3, with the means per  
486 age group summarized in Table 7. The age effect of the likelihood ratio test confirmed the  
487 significant growth in size for 24 out of the 30 variables studied with some variables displaying  
488 more rapid and extensive growth than others. Such findings provide insight on the proportional  
489 and relational growth of upper airway dimensions with age during anatomic restructuring (e.g.,  
490 hyo-laryngeal descent).

491 As expected, all pediatric airway dimensions were substantially smaller than adult  
492 dimensions except oropharynx APDist and to some extent oropharynx width (see Fig 3).  
493 Abramson et al. (2009) also found that volume, CSA and transverse measurements –but not AP  
494 dimensions– of the pediatric naso-oropharynx airway were significantly smaller than adult  
495 measurements. This rapid and early maturation in oropharynx APDist dimension corresponds to  
496 our previous research findings where growth of oral structures in the horizontal plane, in line  
497 with neural growth, achieved most of their growth towards the adults size by age five-years  
498 (Vorperian et al., 2009; Vorperian et al., 2011; Kelly et al., 2017). Alternatively, though unlikely,  
499 it is possible that hypertrophy of lingual tonsils interfered with lumen APDist measurements. As

500 for growth in width, while not as fully developed as AP dimensions by age 5, oropharynx lateral  
501 dimensions had reached over 55% of the adult, suggesting that growth in this subregion  
502 undergoes a combination of neural and general growth types, which Scammon had noted is  
503 present in the growth of structures in the neck region.

504         Volume, volume-length and width measurements increased with age for all pharyngeal  
505 subregions, consistent with prior studies on upper airway development in infant and pre-pubertal  
506 children (Fitch & Giedd, 1999; Abramson et al., 2009). The CSA measurements in this study  
507 were extracted from anatomical landmarks representing the superior and inferior borders of the  
508 pharyngeal subregions. This is in contrast to the typical approach of measuring minimum or  
509 maximum CSA to examine sites of constriction for assessment of patients' risk for OSAS  
510 (Welch et al., 2002; Kim et al., 2011; Alves et al., 2012; Claudino et al., 2013; Anandarajah et  
511 al., 2017; Karia et al., 2017; Masoud et al., 2020). Furthermore, we used oblique planes –  
512 orthogonal to the centerline – which cannot be compared to studies that used the axial plane, as  
513 in most of the above listed studies.

514         A factor that further complicates comparisons, including within-study cross-sectional  
515 comparisons, is the hypertrophy of tonsils in young children that follow a lymphoid growth type.  
516 In particular, nasopharyngeal tonsils referred to as adenoids, where hypertrophy is the highest in  
517 4-6- year old children (Cassano et al., 2003). Keeping these issues in mind, among the five CSA  
518 measurements in this study, the nasopharynx region was the only site that did not have a  
519 significant age-effect. Similarly, the APDist measurements in the nasopharynx and  
520 laryngopharynx were the only sites that did not have significant age effect between the ages < 1-  
521 year and 5-years. Such findings could be attributed to adenoid hypertrophy, typically occurring  
522 between the ages 2-6 years, that diminish airway dimensions (Jeans et al., 1981; Linder-Aronson



523 et al., 1983; de Souza Vilella et al., 2006). The decrease of mean nasopharynx CSA and APDist  
524 measurements per age group can be noted in Table 7, with changes most evident between the  
525 ages 2-to-4 years in this study.

526 In all age groups, the APDist dimensions at the nasopharynx, oropharynx and trachea  
527 (Fig 1a, b, e) were smaller than the width/transverse measurements, but larger than  
528 width/transverse measurements at the glottis (Fig 1d, and Table 7). Such findings are in line with  
529 Abramson et al. (2009) who reported significant upper airway growth along the transverse  
530 dimension with age, where the airway becomes more elliptical in shape. Similarly, Machata et al.  
531 (2010) using MRI studies of children ages 0-6 years, reported smaller anteroposterior dimensions  
532 than transverse dimensions for all ages at the level of the soft palate, the base of the tongue, and  
533 the tip of the epiglottis. In contrast, the laryngopharynx APDist dimensions (Fig 1c), were larger  
534 than width/transverse measurements from birth to age 3, but became smaller than  
535 width/transverse measurements at age 3 and beyond, which likely contributed to the absence of  
536 age effect for APDist.

537 Changes in APDist versus width dimensions could be attributed to the cartilaginous  
538 composition of the larynx. The laryngopharyngeal cross section in this study was designed to  
539 capture its surrounding structures - the aryepiglottic folds on each side, the laryngeal vestibule  
540 anteriorly, and posteriorly by arytenoid cartilages, corniculate cartilages and the interarytenoid  
541 fold. Cartilage ossification is usually not observed until past age 20 years, and the pediatric  
542 laryngopharynx region is often described to be “featureless” and difficult to assess using  
543 commonly acquired medical images (Hudgins et al., 1997). We employed an established method  
544 for airway segmentation that uses image-specific airway thresholds, and therefore are confident  
545 that our data is reflective of airway development. Since we used landmarks on the aryepiglottic

546 folds that connect to the piriform sinuses on each side of the cavity, aditus of larynx, the  
547 laryngopharynx width/transverse measurement in this study excluded the piriform sinuses (see  
548 Fig 1c). The significant age effect along this transverse dimension is therefore truly reflective of  
549 the strong lateral growth in the laryngopharyngeal region.

550 The CSA and transverse width measurements at the level of the glottis are smaller than  
551 the area and width at the first tracheal ring immediately inferior to the cricoid (i.e., subglottal  
552 region); however, the average APDist measurement of the glottis is larger than the APDist  
553 dimension at the level of the first tracheal ring at ages <1-year, 5-years, and in adults. This  
554 finding is consistent with Luscan et al. (2020), who concluded that “the cricoid has a round shape  
555 regardless of the child’s age.” Indeed, the mean APDist and width measurements were very close  
556 or similar for all ages at the level of the first tracheal ring proximal to the inferior border of the  
557 cricoid, and comparable to the cricoid outlet’s (to trachea) anteroposterior and transverse interior  
558 diameters of Liu et al. (2020). While growth trends were comparable, our measurements were  
559 closer to those of Liu et al (2020) than to those of Luscan et al. (2020), and indicate the  
560 importance of methodological considerations, including having well-defined data extraction  
561 protocols such as the determination of an appropriate threshold level (HU) to segment the  
562 airway.

563 Growth in  $VTL_i$  was significant during the first five years of life, confirming an increase  
564 of about 3 cm, which is consistent with VTL findings to date (Vorperian et al., 2009) and reflects  
565 that this modified measure captured growth in both the oral and pharyngeal portions of the VT.  
566 The measurements in this study were smaller than what has been reported previously, which is to  
567 be expected given the modified length measure had an onset at the posterior margin of the  
568 incisors in lieu of the typical anterior margin of the lips. Findings of a significant age effect on

569 velum length were comparable to values reported by Perry et al. (2018) and Yi et al. (2017).  
570 Closer examination of the developmental data on pharyngeal length and pharyngeal volume  
571 revealed a close relationship particularly after about age 2. Before age 2, the growth rate in  
572 length was slightly more pronounced in length than in volume, likely due to the drastic anatomic  
573 restructuring of the skeletal framework in the region of the pharyngeal cavity, including hyo-  
574 laryngeal descent, and rapid neural growth in length of the second cervical spine (C2) (Miller et  
575 al., 2019b).

576         As for the piriform sinuses, our findings revealed a borderline average PSLength age  
577 effect ( $p=.077$ ) with average measurements per age-group summarized in Table 7. The pediatric  
578 average PSLength measurements ranged from 6 to 9 mm at ages <1-year to 5-years; whereas the  
579 adult average PSLength measurements ranged from 1.5 to 1.9 cm. While the development of  
580 piriform sinuses has not been examined to date, and therefore comparative measurements were  
581 not available, adult PSLength measurements were comparable to the 1.6 to 2 cm piriform sinus  
582 depth measurements of Dang and Honda (1997) (Story, 1995; Story et al., 1998). This similarity  
583 was despite the fact that our PSLength measurement extended from the most inferior aspect of  
584 the piriform sinuses to the midpoint of the aryepiglottic folds, which is beyond the arytenoid  
585 apex plane used by Dang and Honda (1997). This could be in part due to differences in imaging  
586 modality used (CT vs MRI) and/or segmentation thresholding levels used to obtain reliable  
587 airway measures, particularly given the small size of this region of interest. Additional factors  
588 include methodological differences (oblique vs, axial plane) in obtaining measurements, as well  
589 as the height of participants, which has been shown to be related to vocal tract length (Fitch &  
590 Giedd, 1999) and pharyngeal dimensions (Inamoto et al., 2015). The piriform sinuses play an  
591 important role during swallowing by diverting liquids around the aditus of the larynx and into the

592 esophagus. They also affect speech acoustics and attenuate the vocal tract resonant frequencies in  
593 adults (Fant, 1971; Baer et al., 1991; Dang & Honda, 1997; Fujita & Honda, 2005) by an  
594 estimated range of 5% of formant frequencies (Dang & Honda, 1997). Thus, detailed  
595 developmental data on the piriform sinuses would provide needed normative data and could help  
596 provide insight on pediatric dysphagia. Furthermore, such data can be used to implement  
597 modeling (Story & Bunton, 2019) to systematically examine the effect of the piriform sinuses on  
598 the resonances of the developing vocal tract, particularly given the intriguing findings that  
599 formant frequencies reportedly remain stable during the first 24-to-36 months of life (Buhr,  
600 1980; Kent & Murray, 1982; Gilbert et al., 1997), despite documented increases in vocal tract  
601 length (Fitch & Giedd, 1999; Vorperian et al., 2005; Vorperian et al., 2009).

602 In summary, the upper airway dimensions reveal persistent growth during the first five  
603 years of life, with some dimensions growing at a faster pace than others. Growth in the vertical  
604 and transverse/lateral dimensions are more pronounced than growth in the AP dimension.

605

## 606 **b. Sex Differences**

607 As depicted in Table 6, sexual dimorphism was present in a number of supra- and sub-glottal  
608 variables in adults. However, while there was evidence towards sexual dimorphism in all three  
609 supra-glottal regions for a number of variables at age <1 year (specifically, larger nasopharynxL  
610 and oropharynxL in females; also, larger nasopharynx APDist and glottis area in males), with the  
611 larger oropharynxL persisting in females at age 5 years, none of these supra-glottal or pharyngeal  
612 variables were significant in children.

613 As for the subglottal region, only subglottal volume-length displayed significant sexual  
614 dimorphism at age < 1-year (with males shorter than females), but not at age 5-years or in adults

615 (see Table 6). To our knowledge, this specific subglottal volume-length measurement has not  
616 been examined, despite its importance in procedures like tracheotomy (Watters, 2017), and  
617 laryngotracheal infections/diseases including SIDS (Thach, 2018) where the incidence is higher  
618 in males (Cornwell, 1993). However, two studies have performed distance measurement in this  
619 region, specifically anterior commissure to first tracheal ring (Khadivi et al., 2015), and vocal  
620 folds to the cricoid cartilage (Sirisopana et al., 2013). Contrary to present findings, Khadivi and  
621 colleagues, who used laryngoscopy to collect subglottal length data from 82 adults (57 males and  
622 25 females), documented significant sexual dimorphism. While our measurements for pediatric  
623 subglottal length are comparable to the normative values reported by Sirisopana and colleagues,  
624 from the CT scans of 56 children (29 males, 27 females), they unfortunately neither assessed for  
625 sex differences, nor reported sex-specific measurements given their primary focus on tracheal  
626 tube design.

627         Despite methodological differences, the absence of sexual dimorphism in pediatric upper  
628 airway data for most of the measurements analyzed in this study was consistent with past studies  
629 (Fitch & Giedd, 1999; Ronen et al., 2007; Barbier et al., 2015). Barbier et al. (2015) did not find  
630 sex difference in pre-pubertal data but suggested that sexual dimorphism in VTL emerged during  
631 puberty. Among studies reporting regional upper airway normative data for the age range  
632 between 0-to-5-years, Abramson et al. (2009) found no difference in naso-pharyngeal airway  
633 size or shape between the sexes in children, but reported longer airway length in post-pubertal  
634 males. Jeans et al. (1981), using lateral cephalometric radiographs to study the nasopharyngeal  
635 airway area – comparable to our nasopharyngeal region –, however, reported mild decreases in  
636 nasopharyngeal area in both 3-to-5-year old males and 3-to-6-year old females. Sex-differences  
637 in the same region using an anteroposterior distance measure in the midsagittal plane of medical

638 imaging studies (MRI & CT), referred to as oropharyngeal-width, have similarly been noted to  
639 display evidence, albeit not significant, towards sexual dimorphism in 3-to-4-year old children  
640 with males having larger width measurements (Vorperian et al., 2011). Linder-Aronson et al.  
641 (1983) noted that nasopharynx airway depth/AP dimension in males were consistently larger  
642 than females throughout ages 3-to-16 years. Sexual dimorphism in the pharyngeal portion of the  
643 VT in ages 8-to-19 years, has also been reported by Vorperian et al. (2011), with the vertical  
644 nasopharyngeal length being longer in females than males and the vertical posterior cavity length  
645 being longer in males than females. In contrast, Yi et al. (2017) reported no sex differences in  
646 any of their linear dimensions using MRI in infants and children up to 72 months. Rommel et al.  
647 (2003), who used curvilinear length drawn on 2D X-ray images to assess naso-oropharynx  
648 segments, found no sex difference in children as young as 0-to-4-years. Griscom (1986) similarly  
649 found no significant sex differences in trachea dimensions until late in adolescence. Definitive  
650 prepubertal sexual dimorphism of the pharynx thus cannot be confirmed with studies available to  
651 date.

652         Detecting sex differences is a difficult task given the critical methodological  
653 considerations outlined in our methods section and the importance of having a large number of  
654 participants per age-group. Statistical analysis methods can overcome differences in growth rate  
655 between males and females, such as implementing continuous-window comparisons across age  
656 (e.g., Vorperian et al., 2011). This latter approach was particularly effective in unveiling sexual  
657 dimorphism that does not persist during the course of development, since growth in females  
658 outpaces males during early development, but growth in males begins to outpace females during  
659 the peripubertal period, with sexual dimorphism emerging during puberty.

660 Sexual dimorphism in adults, however, was mostly present and aligned with research  
661 findings to date in pharynx volume, pharynx length (Inamoto et al., 2015), VTL (Vorperian et  
662 al., 2011), velum length (Perry et al., 2016), glottis APDist (Inamoto et al., 2015), subglottal  
663 volume (Griscom & Wohl, 1986), and tracheal dimensions (Luscan et al., 2020). The finding that  
664 subglottal volume-length, the only measurement that displayed significant sexual dimorphism at  
665 age < 1-year-old was not sexually dimorphic at age 5-years is not surprising, given growth rate  
666 differences in males versus females as noted above. However, the absence of differences in  
667 adults is likely due to both methodological differences and the limited number of adults in this  
668 study ( $n=17$ ), given our stringent inclusion criteria.

669 Although present findings revealed significant prepubertal sex-differences only in the  
670 subglottal region, findings in this study and others as noted above, in the naso-oro-pharyngeal  
671 region, provide sufficient justification to further examine this issue using a larger number of  
672 cases particularly given the above noted critical methodological considerations, and the nuance  
673 of growth rate differences between the two sexes. Such a conclusion is further supported by  
674 auditory-perceptual and acoustic findings where Bloom et al. (1999) reported that adults  
675 accurately identified 3-month old infants' vocalizations as boy vs girl. The only acoustic  
676 difference was the feature of nasality with girls' vocalizations being more nasal than boys.  
677 Furthermore, several studies have reported sex differences in vowel formants (i.e., vocal tract  
678 resonant frequencies) in children as young as 3 or 4 years of age (Yang & Mu, 1989; Perry et al.,  
679 2001; Vorperian et al., 2019).

680

## 681 **c. Percent Growth**

682 The growth pattern of anatomical structures in the craniofacial and upper airway region are  
683 known to be non-uniform with the primary growth types in this region being neural,  
684 general/somatic, and lymphoid. Since we did not include adenoid or tonsil measurements, we  
685 will limit this discussion to the first two types. Both neural and general growth types display  
686 rapid growth during the first few years of life. Scammon (1930) summarized schematically,  
687 however, that by age 5, the percent of the adult mature size reached was drastically different for  
688 the neural (~80%) versus the general (< 40%) growth types. He also noted that growth in the  
689 neck region could be a combination of both neural and general primary growth types (Scammon,  
690 1930, p. 194). The final column of Table 6 presents the model based point-estimates of percent  
691 growth of the adult mature size by age five years for all thirty variables examined in this study.

692 The general finding that by age 5, female upper airway dimensions were larger than  
693 males is not surprising since typically females have a faster growth rate during childhood and  
694 reach the adult mature size sooner than males. Based on findings to date, structures in the upper  
695 airway were expected to follow a mostly somatic growth type or a composite growth of somatic  
696 and neural growth types (Buschang & Hinton, 2005; Vorperian et al., 2009; Wang et al., 2016).  
697 Despite differences in VTL versus VTL<sub>i</sub> measurements (where the onset of the former at the  
698 anterior margin of the lips and the latter is at the posterior margin of the incisors), the general  
699 growth findings in this study are in line with the expected growth trend indicating that VTL<sub>i</sub>  
700 growth type is predominantly hybrid somatic/neural in females (53.38%) and somatic in males  
701 (36.42%) (Vorperian et al., 2009). Similarly, pharynx volume, pharynx volume-length and all  
702 other pharyngeal subdivision volume and volume-length results except for the nasopharynx  
703 subregion confirmed the predominant somatic growth types at age 5-years, in line with the



704 reported growth patterns for pharyngeal cavity length and VT vertical data (Vorperian et al.,  
705 2009). As for the nasopharyngeal region, the expected hybrid somatic/neural or combination  
706 growth type, was indeed reflected in present findings where both male and female nasopharynx  
707 volume and volume-length measurements ranged between 47% and 65% of adult size by age 5-  
708 years. The oropharynx AP dimension exceeded 60% for males and 85% for females, suggestive  
709 of a more pronounced hybrid somatic/neural growth type for the males and neural growth type  
710 for the females. These findings are in line with Vorperian et al. (2009) where structures in oral  
711 region in the horizontal plane reached maturation earlier than structures in pharyngeal region in  
712 the vertical plane. Percent growth analysis (in Table 6, last column) also reflect the presence of  
713 sex-specific differences in the combination of growth types for upper airway structures. Since  
714 multiple factors contribute to growth, it is possible that such sex-specific differences further  
715 contributed to the difficulty in detecting sexual dimorphism during early childhood.

716

## 717 **Conclusions, Study Limitations, and Future Direction for Research**

718 This study, using CT studies, provides data quantifying the 3D growth of the upper  
719 airway with minimal methodological concerns for an age group with scant normative data.  
720 Findings confirm persistent growth of the upper airway during the first five years of life with  
721 growth in the vertical and transverse/lateral dimensions having a faster pace and greater  
722 prominence than growth of anteroposterior dimension. Findings also reveal that at age 5, females  
723 have larger airway dimensions than males. Such findings confirm the importance of studying  
724 sex-specific developmental changes of the upper airway in 3D. A better understanding of  
725 pharyngeal functions and disorders will require further, more detailed examination of the

726 developmental changes in pharyngeal length versus volume and the piriform sinuses, as well as  
727 re-examination of prepubertal sex-differences.

728         Our painstaking efforts to optimize accurate and reliable upper airway measurements  
729 limited the sample size. Specifically, the attrition rate of only retaining retrospective imaging  
730 studies with a neutral head position was high given the head position protocol (Miller et al. 2019)  
731 we applied. Also, despite the imaging protocol at the University Hospital to maintain the head in  
732 midline, it is likely that some rotation was present. However, given that the airway is functional  
733 during imaging (breathing and swallowing), it is difficult to determine source of asymmetry as  
734 noted with the piriform sinuses, where we resorted to averaging them in this study. Furthermore,  
735 airway anatomic measurements can be affected by breathing phase where significant effect of  
736 breathing phase in the oro-laryngo-pharyngeal region has been reported (Rommel et al., 2003).  
737 Such concerns, including the above suggested assessments, could be addressed by replicating  
738 this study using a larger sample size, and ideally increasing the age range to cover the entire  
739 developmental period particularly ages 5-to-20 years.

740         Aside from using a larger sample, having relevant demographic information such as  
741 height, weight, and race would be valuable to include. Given the retrospective nature of this  
742 study, relevant demographic information was not available for all cases. Our imaging database  
743 however, was representative of regional Dane County demographics, with growth between the  
744 10<sup>th</sup> and 95<sup>th</sup> percentiles. We believe our present findings are representative of typical growth  
745 since the natural variability in craniofacial dimensions within individual races is related to the  
746 natural variability or variations within the different racial/ethnic groups (Durtschi et al., 2009).

747         Aside from the use of 3D anatomic landmarks and establishing standardized procedures  
748 to minimize, if not eliminate, methodological limitations on measurement accuracy and

749 reliability, it is also imperative to establish standardized definitions of the pharyngeal subregions  
750 using well-defined anatomical boundaries. This will facilitate accurate representation and  
751 comparison of the developmental morphology of the aerodigestive and vocal tract, within and  
752 across disciplines, including comparison between different imaging modalities. This will  
753 undoubtedly enrich our understanding of the growth of a region that serves multiple life-  
754 functions since each modality has its strengths and limitations. For example, while MRI provides  
755 more accurate information on the growth of lymphoid tissue in the pharyngeal region, CBCT  
756 could address concerns on the effect of body position and gravity on soft-tissue structures for  
757 obtaining reliable airway dimensions. The feasibility of comparing developmental findings  
758 across disciplines, including the individual and relational growth of structures that provide the  
759 skeletal framework of the aerodigestive and vocal tract, will facilitate the understanding of upper  
760 airway pathophysiology, improve surgical planning such as estimation of laryngeal mask airway  
761 size or endotracheal tube diameter, evaluation of pharyngeal collapsibility in early childhood in  
762 the assessment of OSAS, and other upper airway anomalies including swallowing difficulties  
763 and speech disorders. Such information would also facilitate the advancement of developmental  
764 models to assess various typical and atypical functions related to airflow, swallowing, and  
765 speech production.

## 766 Acknowledgments

767 We gratefully acknowledge Lindell R. Gentry, MD for his assistance in establishing the Vocal  
768 Tract Development Laboratory's imaging database. We thank Gabe Jardim for establishing a  
769 protocol to obtain threshold for airway segmentation, and Drs. Andy Alexander and Michael  
770 Speidel for their guidance in resolving and confirming the reliability of this protocol. We also  
771 thank Drs. Moo K. Chung and Nagesh Adluru for their input on centerline development, Ben M.  
772 Doherty for his guidance with the data extraction script, Sophie D. Blankenheim for assistance  
773 with literature review and preparation of Table 1, and Dr. Jacqueline J. Houtman for comments  
774 on an earlier version of this manuscript.

775

776

## 777 References

- 778 Abramson, Z., Susarla, S., Troulis, M., & Kaban, L. (2009). Age-related changes of the upper  
779 airway assessed by 3-dimensional computed tomography. *Journal of Craniofacial*  
780 *Surgery*, 20, 657-663. doi:10.1097/SCS.0b013e318193d521
- 781 Adewale, L. (2009). Anatomy and assessment of the pediatric airway. *Paediatric Anaesthesia*,  
782 19, 1-8. doi:10.1111/j.1460-9592.2009.03012.x
- 783 Alves, M., Franzotti, E. S., Baratieri, C., Nunes, L. K. F., Nojima, L. I., & Ruellas, A. C. O.  
784 (2012). Evaluation of pharyngeal airway space amongst different skeletal patterns.  
785 *International Journal of Oral and Maxillofacial Surgery*, 41, 814-819.  
786 doi:10.1016/j.ijom.2012.01.015
- 787 AnalyzeDirect. (2018). Analyze 12.0. Overland Park, KS: AnalyzeDirect.
- 788 Anandarajah, S., Dudhia, R., Sandham, A., & Sonnesen, L. (2017). Risk factors for small  
789 pharyngeal airway dimensions in preorthodontic children: A three-dimensional study.  
790 *Angle Orthod*, 87(1), 138-146. doi:10.2319/012616-71.1
- 791 Arens, R., & Marcus, C. L. (2004). Pathophysiology of upper airway obstruction: A  
792 developmental perspective. *Sleep*, 27, 997-1019. doi:10.1093/sleep/27.5.997
- 793 Ayappa, I., & Rapoport, D. M. (2003). The upper airway in sleep: Physiology of the pharynx.  
794 *Sleep Medicine Reviews*, 7, 9-33. doi:10.1053/smr.2002.0238
- 795 Baer, T., Gore, J. C., Gracco, L. C., & Nye, P. W. (1991). Analysis of Vocal Tract Shape and  
796 Dimensions using Magnetic Resonance Imaging: Vowels. *Journal of the Acoustical*  
797 *Society of America*, 90(2 Pt 1), 799-828.
- 798 Barbier, G., Boë, L. J., Captier, G., & Laboissière, R. (2015). Human vocal tract growth: A  
799 longitudinal study of the development of various anatomical structures. *Proceedings of*  
800 *the Annual Conference of the International Speech Communication Association*,  
801 *INTERSPEECH, 2015-Janua*, 364-368.

- 802 Bloom, K., Moore-Schoenmakers, K., & Masataka, N. (1999). Nasality of infant vocalizations  
803 determines gender bias in adult favorability ratings. *Journal of Nonverbal Behavior*,  
804 23(3), 219-236. doi:Doi 10.1023/A:1021317310745
- 805 Brooks, L. J., & Strohl, K. P. (1992). Size and mechanical properties of the pharynx in healthy  
806 men and women. *American Review of Respiratory Disease*, 146, 1394-1397.  
807 doi:10.1164/ajrccm/146.6.1394
- 808 Brown, I. G., Zamel, N., & Hoffstein, V. (1986). Pharyngeal cross-sectional area in normal men  
809 and women. *Journal of Applied Physiology*, 61, 890-895.  
810 doi:10.1152/jappl.1986.61.3.890
- 811 Buhr, R. D. (1980). The Emergence of Vowels in an Infant. *Journal of Speech, Language, and*  
812 *Hearing Research*, 23(1), 73-94.
- 813 Bunton, K., & Leddy, M. (2011). An evaluation of articulatory working space area in vowel  
814 production of adults with Down syndrome. *Clin Linguist Phon*, 25(4), 321-334.  
815 doi:10.3109/02699206.2010.535647
- 816 Buschang, P. H., & Hinton, R. J. (2005). A Gradient of Potential for Modifying Craniofacial  
817 Growth. *Seminars in Orthodontics*, 11(4), 219-226. doi:10.1053/j.sodo.2005.07.006
- 818 Carlson, D. S. (2005). Theories of Craniofacial Growth in the Postgenomic Era. *Seminars in*  
819 *Orthodontics*, 11, 172-183.
- 820 Cassano, P., Gelardi, M., Cassano, M., Fiorella, M. L., & Fiorella, R. (2003). Adenoid tissue  
821 rhinopharyngeal obstruction grading based on fiberendoscopic findings: a novel approach  
822 to therapeutic management. *Int J Pediatr Otorhinolaryngol*, 67(12), 1303-1309.  
823 doi:10.1016/j.ijporl.2003.07.018
- 824 Castaldo, G., & Cerritelli, F. (2015). Craniofacial growth: evolving paradigms. *Cranio*, 33(1),  
825 23-31. doi:10.1179/0886963414Z.00000000042
- 826 Chiang, C. C., Jeffres, M. N., Miller, A., & Hatcher, D. C. (2012). Three-dimensional airway  
827 evaluation in 387 subjects from one university orthodontic clinic using cone beam  
828 computed tomography. *Angle Orthod*, 82(6), 985-992. doi:10.2319/122811-801.1
- 829 Claudino, L. V., Mattos, C. T., Ruellas, A. C. D. O., & Sant Anna, E. F. (2013). Pharyngeal  
830 airway characterization in adolescents related to facial skeletal pattern: A preliminary  
831 study. *American Journal of Orthodontics and Dentofacial Orthopedics*.  
832 doi:10.1016/j.ajodo.2013.01.015
- 833 Cornwell, A. C. (1993). Sex differences in the maturation of sleep/wake patterns in high risk for  
834 SIDS infants. *Neuropediatrics*, 24(1), 8-14. doi:10.1055/s-2008-1071505
- 835 Dang, J., & Honda, K. (1997). Acoustic Characteristics of the Piriform Fossa in Models and  
836 Humans. *Journal of the Acoustical Society of America*, 101(1), 456-465.  
837 doi:10.1121/1.417990
- 838 Daraze, A., Delatte, M., Liistro, G., & Majzoub, Z. (2017). Cephalometrics of Pharyngeal  
839 Airway Space in Lebanese Adults. *International Journal of Dentistry*, 2017.  
840 doi:10.1155/2017/3959456
- 841 de Boor, C. (1978). *A Practical Guide to Splines* (Vol. 27). New York, NY: Springer New York.
- 842 de Souza Vilella, B., de Vasconcelos Vilella, O., & Koch, H. A. (2006). Growth of the  
843 nasopharynx and adenoidal development in Brazilian subjects. *Brazilian Oral Research*,  
844 20, 70-75. doi:10.1590/s1806-83242006000100013
- 845 Desbrun, M., Meyer, M., Schröder, P., & Barr, A. H. (1999). *Implicit fairing of irregular meshes*  
846 *using diffusion and curvature flow*. Paper presented at the Proceedings of the 26th annual  
847 conference on Computer graphics and interactive techniques - SIGGRAPH '99.

- 848 Di Carlo, G., Gurani, S. F., Pinholt, E. M., & Cattaneo, P. M. (2017). A new simple three-  
849 dimensional method to characterize upper airway in orthognathic surgery patient.  
850 *Dentomaxillofacial Radiology*, 46. doi:10.1259/dmfr.20170042
- 851 Durtschi, R. B., Chung, D., Gentry, L. R., Chung, M. K., & Vorperian, H. K. (2009).  
852 Developmental craniofacial anthropometry: Assessment of race effects. *Clinical*  
853 *Anatomy*, 22(7), 800-808. doi:10.1002/ca.20852
- 854 Enlow, D. H., & Hans, M. G. (1996). *Essentials of Facial Growth*. Philadelphia: W.B. Saunders  
855 Company.
- 856 Eslami, E., Katz, E. S., Baghdady, M., Abramovitch, K., & Masoud, M. I. (2017). Are three-  
857 dimensional airway evaluations obtained through computed and cone-beam computed  
858 tomography scans predictable from lateral cephalograms? A systematic review of  
859 evidence. *Angle Orthod*, 87(1), 159-167. doi:10.2319/032516-243.1
- 860 Fant, G. (1971). Acoustic Theory of Speech Production. *Acoustic Theory of Speech Production*.  
861 doi:10.1515/9783110873429
- 862 Fitch, W. T., & Giedd, J. (1999). Morphology and development of the human vocal tract: A  
863 study using magnetic resonance imaging. *The Journal of the Acoustical Society of*  
864 *America*, 106, 1511-1522. doi:10.1121/1.427148
- 865 Fregosi, R. F., Quan, S. F., Kaemingk, K. L., Morgan, W. J., Goodwin, J. L., Cabrera, R., &  
866 Gmitro, A. (2003). Sleep-disordered breathing, pharyngeal size and soft tissue anatomy  
867 in children. *Journal of Applied Physiology*, 95, 2030-2038.  
868 doi:10.1152/jappphysiol.00293.2003
- 869 Fujita, S., & Honda, K. (2005). An experimental study of acoustic characteristics of  
870 hypopharyngeal cavities using vocal tract solid models. *Acoustical Science and*  
871 *Technology*, 26(4), 353-357. doi:10.1250/ast.26.353
- 872 Gibelli, D., Cellina, M., Gibelli, S., Oliva, A. G., Termine, G., & Sforza, C. (2020). Three-  
873 Dimensional Assessment of Pharyngeal Volume on Computed Tomography Scans:  
874 Applications to Anesthesiology and Endoscopy. *Journal of Craniofacial Surgery*, 00, 1.  
875 doi:10.1097/scs.0000000000006094
- 876 Gilbert, H. R., Robb, M. P., & Chen, Y. (1997). Formant frequency development: 15 to 36  
877 months. *Journal of Voice*, 11(3), 260-266.
- 878 Goncalves, R. d. C., Raveli, D. B., & Pinto Ados, S. (2011). Effects of age and gender on upper  
879 airway, lower airway and upper lip growth. *Braz Oral Res*, 25(3), 241-247.  
880 doi:10.1590/s1806-83242011000300009
- 881 Griscom, N. T., & Wohl, M. E. B. (1986). Dimensions of the growing trachea related to age and  
882 gender. *American Journal of Roentgenology*, 146(2), 233-237. doi:10.2214/ajr.146.2.233
- 883 Gu, M., McGrath, C. P. J., Hägg, U., Wong, R. W. K., & Yang, Y. (2016). Anatomy of the  
884 Upper Airway and Its Growth in Childhood. *Journal of Dentistry and Oral Biology*, 1.
- 885 Gurani, S. F., Di Carlo, G., Cattaneo, P. M., Thorn, J. J., & Pinhol, E. M. (2016). Effect of Head  
886 and Tongue Posture on the Pharyngeal Airway Dimensions and Morphology in Three-  
887 Dimensional Imaging: a Systematic Review. *Journal of Oral and Maxillofacial Research*,  
888 7, 1-12. doi:10.5037/jomr.2016.7101
- 889 Hudgins, P. A., Siegel, J., Jacobs, I., & Abramowsky, C. R. (1997). The normal pediatric larynx  
890 on CT and MR. *AJNR Am J Neuroradiol*, 18(2), 239-245.
- 891 Hunyandi, L. (2010). B-splines: MATLAB Central File Exchange. Retrieved from  
892 <https://www.mathworks.com/matlabcentral/fileexchange/27374-b-splines>

- 893 Inamoto, Y., Saitoh, E., Okada, S., Kagaya, H., Shibata, S., Baba, M., . . . Palmer, J. B. (2015).  
894 Anatomy of the larynx and pharynx: Effects of age, gender and height revealed by  
895 multidetector computed tomography. *Journal of Oral Rehabilitation*, *42*, 670-677.  
896 doi:10.1111/joor.12298
- 897 Jeans, W. D., Fernando, D. C. J., Maw, A. R., & Leighton, B. C. (1981). A longitudinal study of  
898 the growth of the nasopharynx and its contents in normal children. *The British Journal of*  
899 *Radiology*, *54*(638), 117-121. doi:10.1259/0007-1285-54-638-117
- 900 Jiang, Y. Y., Xu, X., Su, H. L., & Liu, D. X. (2014). Gender-related difference in the upper  
901 airway dimensions and hyoid bone position in Chinese Han children and adolescents  
902 aged 6-18 years using cone beam computed tomography. *Acta Odontologica*  
903 *Scandinavica*, *73*, 391-400. doi:10.3109/00016357.2014.978366
- 904 Karia, H., Shrivastav, S., & Karia, A. K. (2017). Three-dimensional evaluation of the airway  
905 spaces in patients with and without cleft lip and palate: A digital volume tomographic  
906 study. *Am J Orthod Dentofacial Orthop*, *152*(3), 371-381.  
907 doi:10.1016/j.ajodo.2016.12.026
- 908 Kelly, M. P., Vorperian, H. K., Wang, Y., Tillman, K. K., Werner, H. M., Chung, M. K., &  
909 Gentry, L. R. (2017). Characterizing mandibular growth using three-dimensional imaging  
910 techniques and anatomic landmarks. *Archives of Oral Biology*, *77*, 27-38.  
911 doi:10.1016/j.archoralbio.2017.01.018
- 912 Kent, R. D., & Murray, A. D. (1982). Acoustic Features of Infant Vocalic Utterances at 3, 6, and  
913 9 Months. *Journal of the Acoustical Society of America*, *72*(2), 353-365. doi:Doi  
914 10.1121/1.388089
- 915 Kent, R. D., & Vorperian, H. K. (2013). Speech Impairment in Down Syndrome: A Review.  
916 *Journal of Speech, Language, and Hearing Research*, *56*(1), 178-210.
- 917 Khadivi, E., Zaringhalam, M. A., Khazaeni, K., & Bakhshae, M. (2015). Distance between  
918 anterior commissure and the first tracheal ring: An important new clinical laryngotracheal  
919 measurement. *Iranian Journal of Otorhinolaryngology*, *27*(80), 193-197.  
920 doi:10.22038/ijorl.2015.4252
- 921 Kim, E. J., Choi, J. H., Kim, Y. S., Kim, T. H., Lee, S. H., Lee, H. M., . . . Lee, S. H. (2011).  
922 Upper airway changes in severe obstructive sleep apnea: Upper airway length and  
923 volumetric analyses using 3D MDCT. *Acta Oto-Laryngologica*, *131*, 527-532.  
924 doi:10.3109/00016489.2010.535561
- 925 Laird, A. M., Yetkiner, E., Kadioglu, O., & Currier, G. F. (2019). The Upper Airway. In O.  
926 Kadioglu & G. F. Currier (Eds.), *Craniofacial 3D Imaging: Current Concepts in*  
927 *Orthodontics and Oral and Maxillofacial Surgery* (pp. 97-112). Cham: Springer  
928 International Publishing.
- 929 Laitman, J. T., & Crelin, E. S. (1976). Postnatal development of the basicranium and vocal tract  
930 region in man. In J. Bosma (Ed.), *Symposium on the development of the basicranium* (pp.  
931 206-220). Bethesda, MD: DHEW Publicaiton No. 76-989, PHS-NIH.
- 932 Lazarus, F., & Verroust, A. (1999). Level set diagrams of polyhedral objects. *Proceedings of the*  
933 *Symposium on Solid Modeling and Applications*, 130-140. doi:10.1145/304012.304025
- 934 Leboulanger, N., Louis, B., Fodil, R., Boelle, P. Y., Clement, A., Garabedian, E. N., & Fauroux,  
935 B. (2011). Analysis of the pharynx and the trachea by the acoustic reflection method in  
936 children: a pilot study. *Respir Physiol Neurobiol*, *175*(2), 228-233.  
937 doi:10.1016/j.resp.2010.11.008

- 938 Lenza, M. G., De, M. M., Dalstra, M., Melsen, B., & Cattaneo, P. M. (2010). An analysis of  
939 different approaches to the assessment of upper airway morphology: A CBCT study.  
940 *Orthodontics and Craniofacial Research*, 13(2), 96-105. doi:10.1111/j.1601-  
941 6343.2010.01482.x
- 942 Li, H., Lu, X., Shi, J., & Shi, H. (2011). Measurements of normal upper airway assessed by 3-  
943 dimensional computed tomography in Chinese children and adolescents. *International*  
944 *Journal of Pediatric Otorhinolaryngology*, 75, 1240-1246.  
945 doi:10.1016/j.ijporl.2011.06.022
- 946 Lieberman, D. E. (2011). Epigenetic Integration, Complexity, and Evolvability of the Head. In  
947 B. Hallgrímsson & B. K. Hall (Eds.), *Epigenetics: Linking Genotype and Phenotype in*  
948 *Development and Evolution* (pp. 271-289): University of California Press.
- 949 Linder-Aronson, S., Stockholm, B. C. L., & London, S. (1983). *A longitudinal study of the*  
950 *development of the posterior nasopharyngeal wall between 3 and 16 years of age*. Paper  
951 presented at the European Journal of Orthodontics.
- 952 Litman, R. S., Weissend, E. E., Shrier, D. A., & Ward, D. S. (2002). *Morphologic Changes in*  
953 *the Upper Airway of Children during Awakening from Propofol Administration*. Paper  
954 presented at the Anesthesiology.
- 955 Liu, S., Qi, W., Zhang, X., & Dong, Y. (2020). The development of the cricoid cartilage and its  
956 implications for the use of endotracheal tubes in the pediatric population. *Pediatric*  
957 *Anesthesia*, 30(1), 63-68. doi:<https://doi.org/10.1111/pan.13772>
- 958 Logan, B. M., Reynolds, P. A., Rice, S., & Hutchings, R. T. (2017). Nose, oral cavity, pharynx,  
959 ear and larynx. In B. M. Logan, P. A. Reynolds, & S. Rice (Eds.), *McMinn's Color Atlas*  
960 *of Head and Neck Anatomy* (5 ed.): Elsevier Ltd.
- 961 Lorensen, W. E., & Cline, H. E. (1987). *Marching cubes: A high resolution 3D surface*  
962 *construction algorithm*. Paper presented at the Proceedings of the 14th annual conference  
963 on Computer graphics and interactive techniques.
- 964 Luscan, R., Leboulanger, N., Fayoux, P., Kerner, G., Belhous, K., Couloigner, V., . . . Thierry,  
965 B. (2020). Developmental changes of upper airway dimensions in children. *Pediatric*  
966 *Anesthesia*, pan.13832. doi:10.1111/pan.13832
- 967 Machata, A. M., Kabon, B., Willschke, H., Prayer, D., & Marhofer, P. (2010). Upper airway size  
968 and configuration during propofol-based sedation for magnetic resonance imaging: An  
969 analysis of 138 infants and children. *Paediatric Anaesthesia*, 20, 994-1000.  
970 doi:10.1111/j.1460-9592.2010.03419.x
- 971 Marcus, C. L., Smith, R. J. H., Mankarious, L. A., Arens, R., Mitchell, G. S., Elluru, R. G., . . .  
972 Blaisdell, C. J. (2009). *Developmental aspects of the upper airway: Report from an*  
973 *NHLBI Workshop, March 5-6, 2009*. Paper presented at the Proceedings of the American  
974 Thoracic Society.
- 975 Martin, S. E., Mathur, R., Marshall, I., & Douglas, N. J. (1997). The effect of age, sex, obesity  
976 and posture on upper airway size. *European Respiratory Journal*, 10, 2087-2090.  
977 doi:10.1183/09031936.97.10092087
- 978 Masoud, A. I., Alwadei, F. H., Alwadei, A. H., Lin, E. Y., Viana, M. G. C., Kusnoto, B., &  
979 Evans, C. A. (2020). Developing pediatric three-dimensional upper airway normative  
980 values using fixed and interactive thresholds. *Oral Radiology*, 36, 89-99.  
981 doi:10.1007/s11282-019-00384-3



- 982 Miller, C. A., Hwang, S. J., Cotter, M. M., & Vorperian, H. K. (2019a). Cervical vertebral body  
983 growth and emergence of sexual dimorphism: a developmental study using computed  
984 tomography. *Journal of Anatomy*, 234, 764-777. doi:10.1111/joa.12976
- 985 Miller, C. A., Lee, Y., Avey, G. D., & Vorperian, H. K. (2019b). Head position classification of  
986 medical imaging studies: an assessment and development of a protocol.  
987 *Dentomaxillofacial Radiology*, 20190220. doi:10.1259/dmfr.20190220
- 988 Mislík, B., Hänggi, M. P., Signorelli, L., Peltomäki, T. A., & Patcas, R. (2014). Pharyngeal  
989 airway dimensions: A cephalometric, growth-study-based analysis of physiological  
990 variations in children aged 6-17. *European Journal of Orthodontics*, 36, 331-339.  
991 doi:10.1093/ejo/cjt068
- 992 Moore, K., Dalley, A., & Agur, A. M. R. (2006). Neck. In *Clinically Oriented Anatomy* (7 ed.):  
993 Lippincott Williams & Wilkins.
- 994 Moss, M. L. (1997a). The functional matrix hypothesis revisited. 1. The role of  
995 mechanotransduction. *American Journal of Orthodontics and Dentofacial Orthopedics*,  
996 112(1), 8-11. doi:[https://doi.org/10.1016/S0889-5406\(97\)70267-1](https://doi.org/10.1016/S0889-5406(97)70267-1)
- 997 Moss, M. L. (1997b). The functional matrix hypothesis revisited. 2. The role of an osseous  
998 connected cellular network. *American Journal of Orthodontics and Dentofacial*  
999 *Orthopedics*, 112(2), 221-226. doi:[https://doi.org/10.1016/S0889-5406\(97\)70249-X](https://doi.org/10.1016/S0889-5406(97)70249-X)
- 1000 Moss, M. L. (1997c). The functional matrix hypothesis revisited. 3. The genomic thesis.  
1001 *American Journal of Orthodontics and Dentofacial Orthopedics*, 112(3), 338-342.  
1002 doi:[https://doi.org/10.1016/S0889-5406\(97\)70265-8](https://doi.org/10.1016/S0889-5406(97)70265-8)
- 1003 Moss, M. L. (1997d). The functional matrix hypothesis revisited. 4. The epigenetic antithesis and  
1004 the resolving synthesis. *American Journal of Orthodontics and Dentofacial Orthopedics*,  
1005 112(4), 410-417. doi:[https://doi.org/10.1016/S0889-5406\(97\)70049-0](https://doi.org/10.1016/S0889-5406(97)70049-0)
- 1006 Nakano, H., Mishima, K., Ueda, Y., Matsushita, A., Suga, H., Miyawaki, Y., . . . Ueyama, Y.  
1007 (2013). A new method for determining the optimal CT threshold for extracting the upper  
1008 airway. *Dentomaxillofacial Radiology*, 42. doi:10.1259/dmfr/26397438
- 1009 Netter, F. H. (2019). Head and Neck. In *Atlas of Human Anatomy* (7 ed., pp. 11-174).  
1010 Philadelphia, PA: Elsevier Inc.
- 1011 Ono, T., Otsuka, R., Kuroda, T., Honda, E., & Sasaki, T. (2000). Effects of head and body  
1012 position on two- and three-dimensional configurations of the upper airway. *Journal of*  
1013 *Dental Research*, 79, 1879-1884. doi:10.1177/00220345000790111101
- 1014 Perry, J. L., Kollara, L., Kuehn, D. P., Sutton, B. P., & Fang, X. (2018). Examining age, sex, and  
1015 race characteristics of velopharyngeal structures in 4- to 9-year-old children using  
1016 magnetic resonance imaging. *Cleft Palate-Craniofacial Journal*, 55, 21-34.  
1017 doi:10.1177/1055665617718549
- 1018 Perry, J. L., Kuehn, D. P., Sutton, B. P., Gamage, J. K., & Fang, X. (2016). Anthropometric  
1019 analysis of the velopharynx and related craniometric dimensions in three adult  
1020 populations using MRI. *Cleft Palate-Craniofacial Journal*, 53, e1-e13. doi:10.1597/14-  
1021 015
- 1022 Roche, A. F., & Barkla, D. H. (1987). The level of the larynx during childhood. 645-654.
- 1023 Rommel, N., Bellon, E., Hermans, R., Smet, M., De Meyer, A. M., Feenstra, L., . . . Veereman-  
1024 Wauters, G. (2003). Development of the Orohypopharyngeal Cavity in Normal Infants  
1025 and Young Children. *Cleft Palate-Craniofacial Journal*, 40, 606-611. doi:10.1597/1545-  
1026 1569(2003)040<0606:DOTOCI>2.0.CO;2

- 1027 Ronen, O., Malhotra, A., & Pillar, G. (2007). Influence of Gender and Age on Upper-Airway  
1028 Length During Development. *Pediatrics*, *120*, e1028-e1034.
- 1029 Scammon, R. E. (1930). The measurement of the body in childhood. In J. A. Harris, C. M.  
1030 Jackson, D. G. Paterson, & R. E. Scammon (Eds.), *The measurement of man* (pp. 173-  
1031 215). Minneapolis, MN: The University of Minnesota Press.
- 1032 Schendel, S. A., Jacobson, R., & Khalessi, S. (2012). Airway growth and development: A  
1033 computerized 3-dimensional analysis. *Journal of Oral and Maxillofacial Surgery*, *70*,  
1034 2174-2183. doi:10.1016/j.joms.2011.10.013
- 1035 Schuenke, M., Schulte, E., & Schumacher, U. (2010). Oral Cavity and Perioral Region. In E. W.  
1036 Baker (Ed.), *Head and Neck Anatomy for Dental Medicine* (pp. 216). New York, NY:  
1037 Thieme.
- 1038 Seo, S., Chung, M. K., Whyms, B. J., & Vorperian, H. K. (2011). *Mandible shape modeling*  
1039 *using the second eigenfunction of the Laplace-Beltrami operator*. Paper presented at the  
1040 Medical Imaging 2011: Image Processing.
- 1041 Sheng, C. M., Lin, L. H., Su, Y., & Tsai, H. H. (2009). Developmental changes in pharyngeal  
1042 airway depth and hyoid bone position from childhood to young adulthood. *Angle*  
1043 *Orthodontist*, *79*, 484-490. doi:10.2319/062308-328.1
- 1044 Shi, Y., Lai, R., Krishna, S., Sicotte, N., Dinov, I., & Toga, A. W. (2008). Anisotropic Laplace-  
1045 Beltrami Eigenmaps: Bridging Reeb Graphs and Skeletons. *Proc IEEE Comput Soc Conf*  
1046 *Comput Vis Pattern Recognit, 2008*, 1-7. doi:10.1109/CVPRW.2008.4563018
- 1047 Shigeta, Y., Takumi, O., Venturin, J., Nguyen, M., Clark, G. T., & Enciso, R. (2008). Gender  
1048 and age-based differences in computed-tomography measurements of the oropharynx.  
1049 *Oral Surg Oral Med Oral Pathol Oral Radiol Endod*, *106*(4).
- 1050 Sirisopana, M., Saint-Martin, C., Wang, N. N., Manoukian, J., Nguyen, L. H. P., & Brown, K. A.  
1051 (2013). Novel measurements of the length of the subglottic airway in infants and young  
1052 children. *Anesthesia and Analgesia*, *117*(2), 462-470.  
1053 doi:10.1213/ANE.0b013e3182991d42
- 1054 Smitthimedhin, A., Whitehead, M., Bigdeli, M., Gustavo, N., Geovanny, P., & Hansel, O.  
1055 (2018). MRI determination of volumes for the upper airway and pharyngeal lymphoid  
1056 tissue in preterm and term infants. *Clinical Imaging*, *50*, 51-56.  
1057 doi:10.1016/j.clinimag.2017.12.010
- 1058 Standerwick, R. G., & Roberts, W. E. (2009). The aponeurotic tension model of craniofacial  
1059 growth in man. *Open Dent J*, *3*, 100-113. doi:10.2174/1874210600903010100
- 1060 Standring, S. (2016). Gray's anatomy : the anatomical basis of clinical practice. In (Forty-first  
1061 edition. ed., pp. xviii, 1562 pages). New York: Elsevier Limited.
- 1062 Story, B. H. (1995). *Physiologically-based speech simulation using an enhanced wave-reflection*  
1063 *model of the vocal tract*. (9536255 Ph.D.), The University of Iowa, Ann Arbor. Retrieved  
1064 from [https://ezproxy.library.wisc.edu/login?url=https://www.proquest.com/dissertations-](https://ezproxy.library.wisc.edu/login?url=https://www.proquest.com/dissertations-theses/physiologically-based-speech-simulation-using/docview/304203447/se-2?accountid=465)  
1065 [theses/physiologically-based-speech-simulation-using/docview/304203447/se-](https://ezproxy.library.wisc.edu/login?url=https://www.proquest.com/dissertations-theses/physiologically-based-speech-simulation-using/docview/304203447/se-2?accountid=465)  
1066 [2?accountid=465](https://ezproxy.library.wisc.edu/login?url=https://www.proquest.com/dissertations-theses/physiologically-based-speech-simulation-using/docview/304203447/se-2?accountid=465)
- 1067 [https://resolver.library.wisconsin.edu/uwmad??url\\_ver=Z39.88-](https://resolver.library.wisconsin.edu/uwmad??url_ver=Z39.88-2004&rft_val_fmt=info:ofi/fmt:kev:mtx:dissertation&genre=dissertations+%26+theses&sid=ProQ:ProQuest+Dissertations+%26+Theses+Global&atitle=&title=Physiologically-based+speech+simulation+using+an+enhanced+wave-reflection+model+of+the+vocal+tract&issn=&date=1995-01-01&volume=&issue=&spage=&au=Story%2C+Brad+Hudson&isbn=&jtitle=&btile=&rf)  
1068 [2004&rft\\_val\\_fmt=info:ofi/fmt:kev:mtx:dissertation&genre=dissertations+%26+theses&](https://resolver.library.wisconsin.edu/uwmad??url_ver=Z39.88-2004&rft_val_fmt=info:ofi/fmt:kev:mtx:dissertation&genre=dissertations+%26+theses&sid=ProQ:ProQuest+Dissertations+%26+Theses+Global&atitle=&title=Physiologically-based+speech+simulation+using+an+enhanced+wave-reflection+model+of+the+vocal+tract&issn=&date=1995-01-01&volume=&issue=&spage=&au=Story%2C+Brad+Hudson&isbn=&jtitle=&btile=&rf)  
1069 [sid=ProQ:ProQuest+Dissertations+%26+Theses+Global&atitle=&title=Physiologically-](https://resolver.library.wisconsin.edu/uwmad??url_ver=Z39.88-2004&rft_val_fmt=info:ofi/fmt:kev:mtx:dissertation&genre=dissertations+%26+theses&sid=ProQ:ProQuest+Dissertations+%26+Theses+Global&atitle=&title=Physiologically-based+speech+simulation+using+an+enhanced+wave-reflection+model+of+the+vocal+tract&issn=&date=1995-01-01&volume=&issue=&spage=&au=Story%2C+Brad+Hudson&isbn=&jtitle=&btile=&rf)  
1070 [based+speech+simulation+using+an+enhanced+wave-](https://resolver.library.wisconsin.edu/uwmad??url_ver=Z39.88-2004&rft_val_fmt=info:ofi/fmt:kev:mtx:dissertation&genre=dissertations+%26+theses&sid=ProQ:ProQuest+Dissertations+%26+Theses+Global&atitle=&title=Physiologically-based+speech+simulation+using+an+enhanced+wave-reflection+model+of+the+vocal+tract&issn=&date=1995-01-01&volume=&issue=&spage=&au=Story%2C+Brad+Hudson&isbn=&jtitle=&btile=&rf)  
1071 [reflection+model+of+the+vocal+tract&issn=&date=1995-01-](https://resolver.library.wisconsin.edu/uwmad??url_ver=Z39.88-2004&rft_val_fmt=info:ofi/fmt:kev:mtx:dissertation&genre=dissertations+%26+theses&sid=ProQ:ProQuest+Dissertations+%26+Theses+Global&atitle=&title=Physiologically-based+speech+simulation+using+an+enhanced+wave-reflection+model+of+the+vocal+tract&issn=&date=1995-01-01&volume=&issue=&spage=&au=Story%2C+Brad+Hudson&isbn=&jtitle=&btile=&rf)  
1072 [01&volume=&issue=&spage=&au=Story%2C+Brad+Hudson&isbn=&jtitle=&btile=&rf](https://resolver.library.wisconsin.edu/uwmad??url_ver=Z39.88-2004&rft_val_fmt=info:ofi/fmt:kev:mtx:dissertation&genre=dissertations+%26+theses&sid=ProQ:ProQuest+Dissertations+%26+Theses+Global&atitle=&title=Physiologically-based+speech+simulation+using+an+enhanced+wave-reflection+model+of+the+vocal+tract&issn=&date=1995-01-01&volume=&issue=&spage=&au=Story%2C+Brad+Hudson&isbn=&jtitle=&btile=&rf)

- 1073 [t\\_id=info:eric/&rft\\_id=info:doi/](#) Dissertations & Theses @ CIC Institutions; ProQuest  
1074 Dissertations & Theses Global database.
- 1075 Story, B. H., & Bunton, K. (2019). A model of speech production based on the acoustic relativity  
1076 of the vocal tract. *J Acoust Soc Am*, 146(4), 2522. doi:10.1121/1.5127756
- 1077 Story, B. H., Titze, I. R., & Hoffman, E. A. (1998). Vocal tract area functions for an adult female  
1078 speaker based on volumetric imaging. *The Journal of the Acoustical Society of America*,  
1079 104(1), 471-487.
- 1080 Thach, B. T. (2018). The Role of the Upper Airway in SIDS and Sudden Unexpected Infant  
1081 Deaths and the Importance of External Airway-Protective Behaviors. In J. R. Duncan &  
1082 R. W. Byard (Eds.), *SIDS Sudden Infant and Early Childhood Death: The Past, the*  
1083 *Present and the Future*. Adelaide (AU).
- 1084 Vorperian, H. K., Kent, R. D., Lindstrom, M. J., Kalina, C. M., Gentry, L. R., & Yandell, B. S.  
1085 (2005). Development of vocal tract length during early childhood: A magnetic resonance  
1086 imaging study. *The Journal of the Acoustical Society of America*, 117, 338-350.  
1087 doi:10.1121/1.1835958
- 1088 Vorperian, H. K., Wang, S., Chung, M. K., Schimek, E. M., Durtschi, R. B., Kent, R. D., . . .  
1089 Gentry, L. R. (2009). Anatomic development of the oral and pharyngeal portions of the  
1090 vocal tract: An imaging study. *The Journal of the Acoustical Society of America*, 125,  
1091 1666-1678. doi:10.1121/1.3075589
- 1092 Vorperian, H. K., Wang, S., Michael Schimek, E., Durtschi, R. B., Kent, R. D., Gentry, L. R., &  
1093 Chung, M. K. (2011). Developmental sexual dimorphism of the oral and pharyngeal  
1094 portions of the vocal tract: An imaging study. *Journal of Speech, Language, and Hearing*  
1095 *Research*, 54, 995-1010. doi:10.1044/1092-4388(2010/10-0097)
- 1096 Wang, Y., Chung, M. K., & Vorperian, H. K. (2016). Composite growth model applied to human  
1097 oral and pharyngeal structures and identifying the contribution of growth types.  
1098 *Statistical Methods in Medical Research*, 25, 1975-1990.  
1099 doi:10.1177/0962280213508849
- 1100 Watters, K. F. (2017). Tracheostomy in Infants and Children. *Respiratory Care*, 62, 799-825.
- 1101 Welch, K. C., Foster, G. D., Ritter, C. T., Wadden, T. A., Arens, R., Maislin, G., & Schwab, R. J.  
1102 (2002). A Novel Volumetric Magnetic Resonance Imaging Paradigm to Study Upper  
1103 Airway Anatomy. *Sleep*, 25, 530-540. doi:10.1093/sleep/25.5.530
- 1104 Yanagita, N., Terajima, M., Kanomi, R., & Takahashi, I. (2019). Three-dimensional analysis of  
1105 pharyngeal airway morphology in Japanese female adolescents. *Orthodontic Waves*,  
1106 76(2), 89-96. doi:10.1016/j.odw.2017.01.004
- 1107 Yi, X., Yao, L., Yuan, X., Wei, Y., & Wang, Z. (2017). Linear dimensions of normal upper  
1108 airway structure by magnetic resonance imaging in Chinese Han infants and preschool  
1109 children. *Sleep Medicine*, 37, 98-104. doi:10.1016/j.sleep.2017.06.011

1110

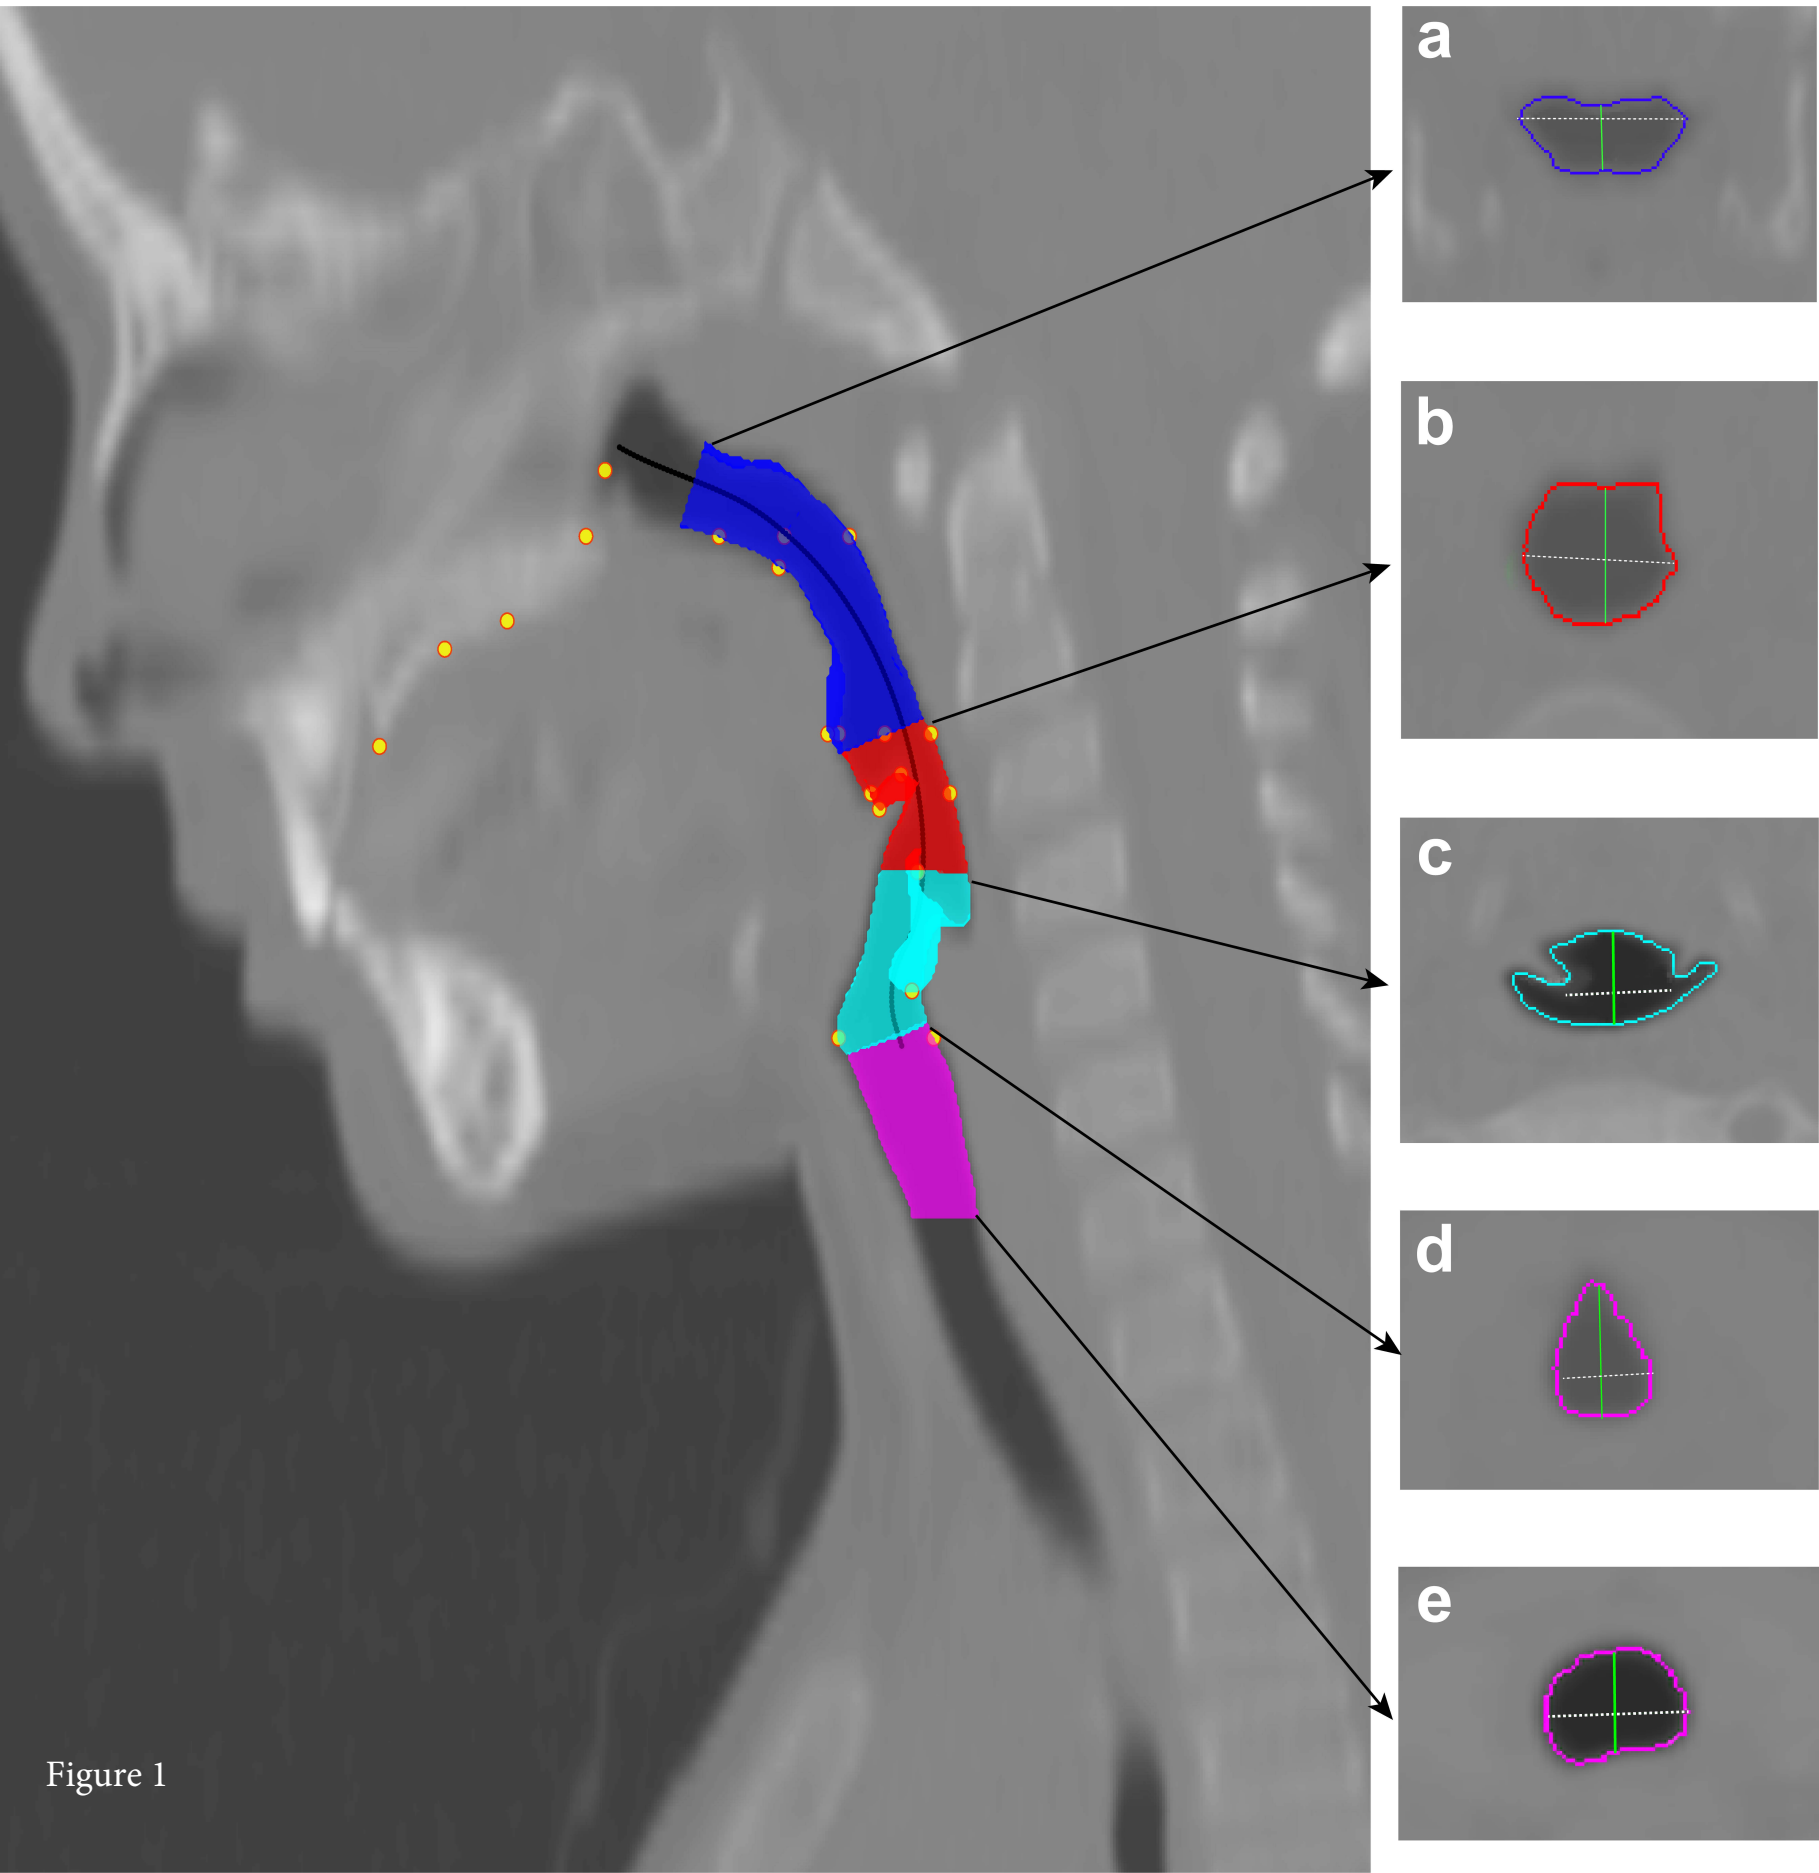

Figure 1

M245-04-08-002

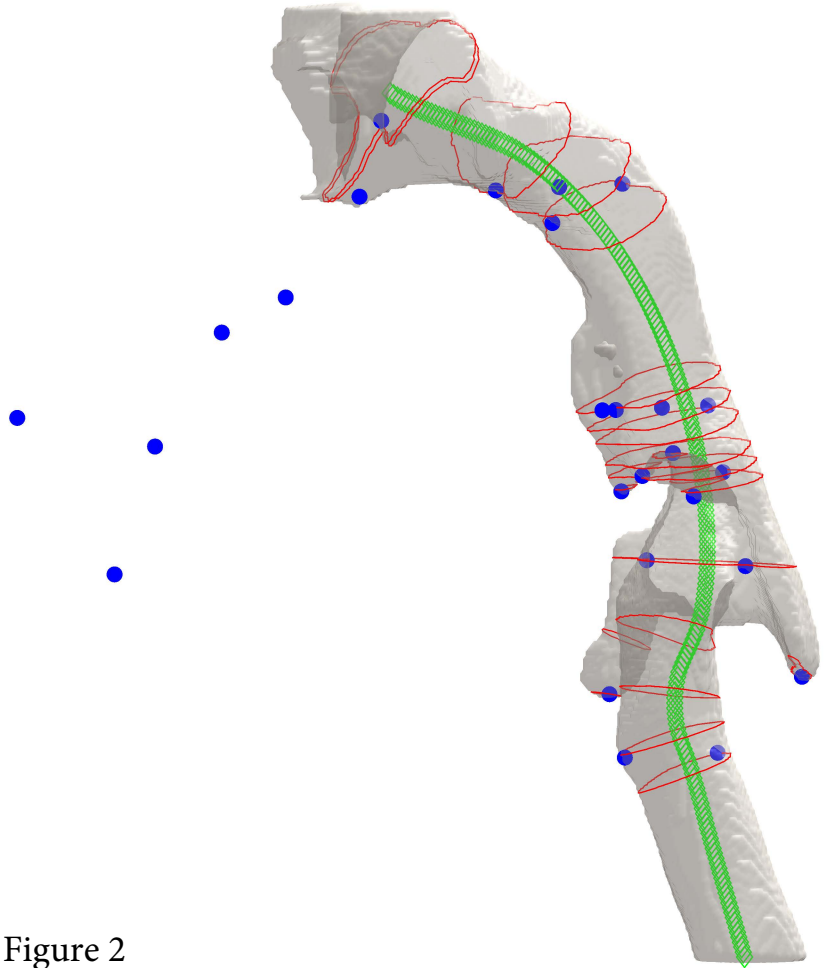

Figure 2

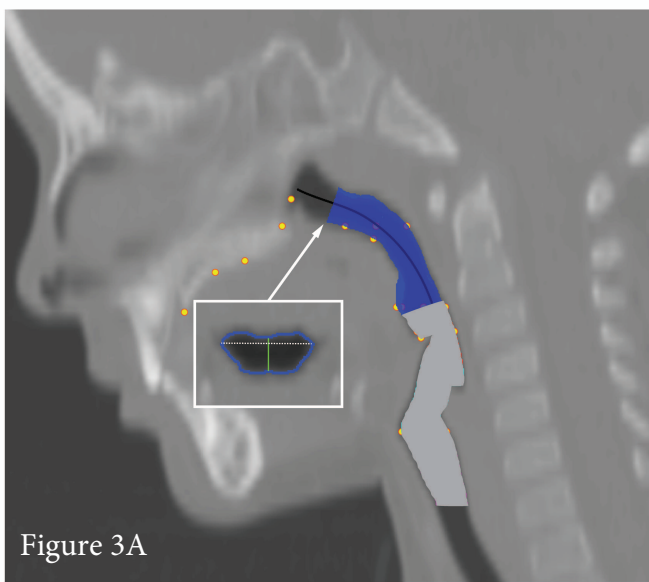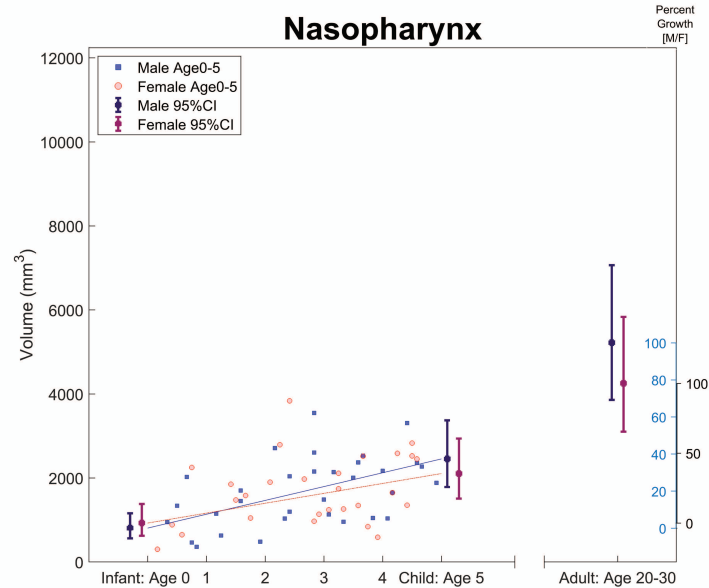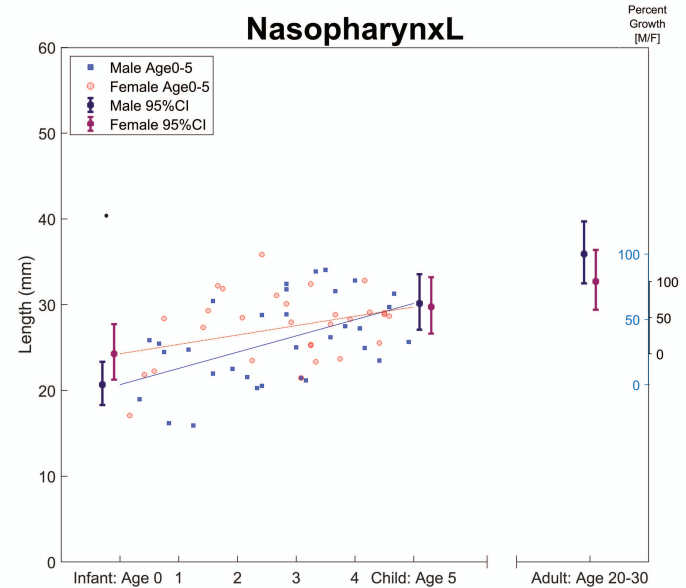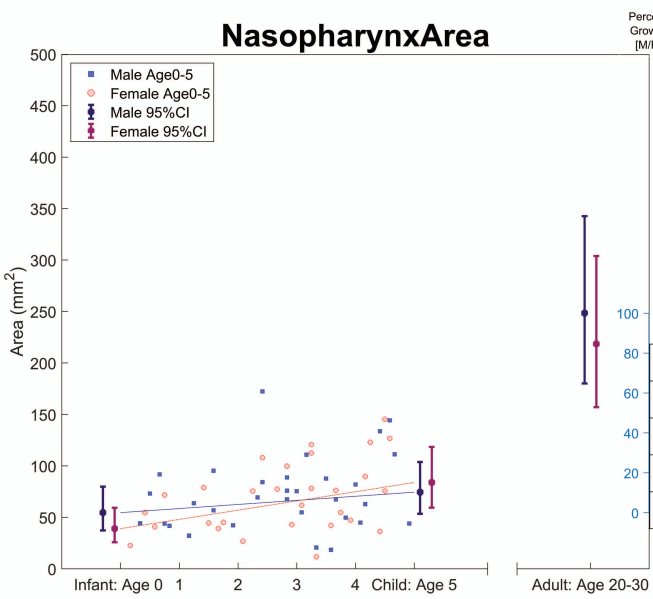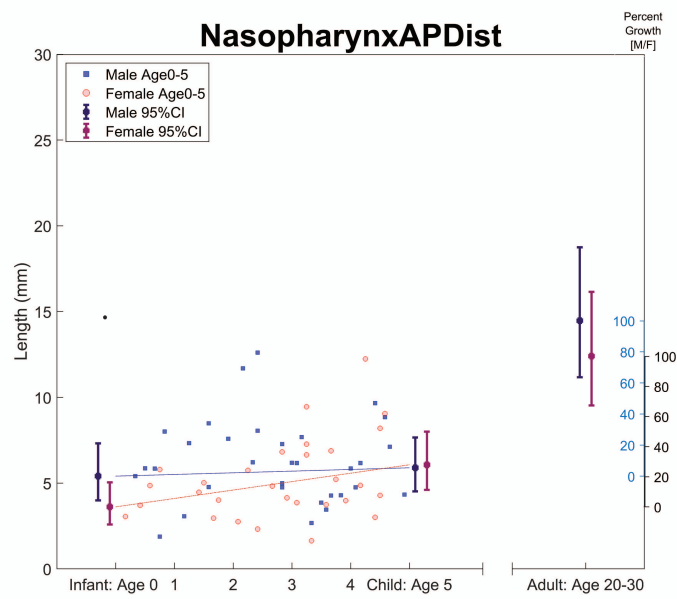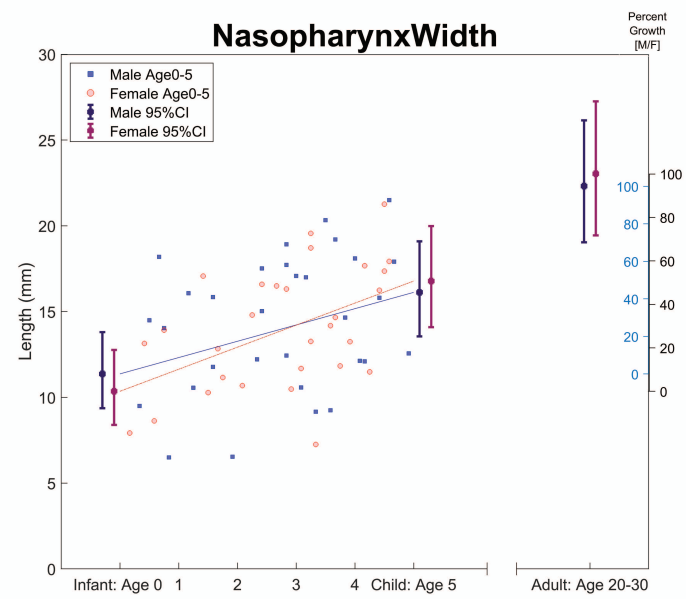

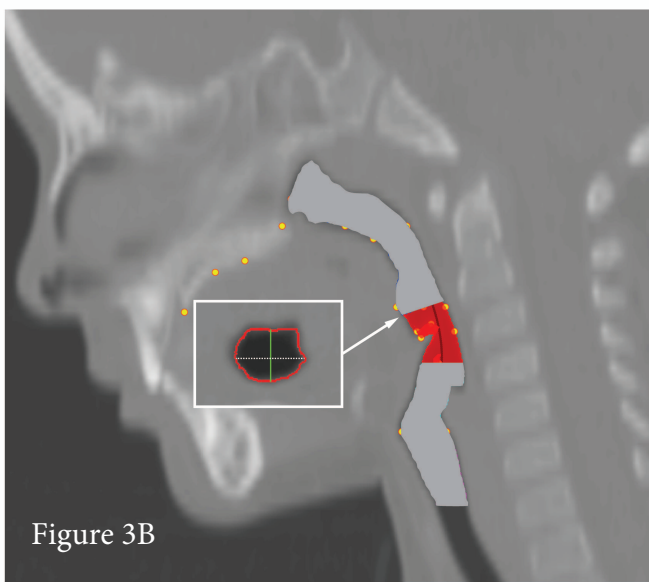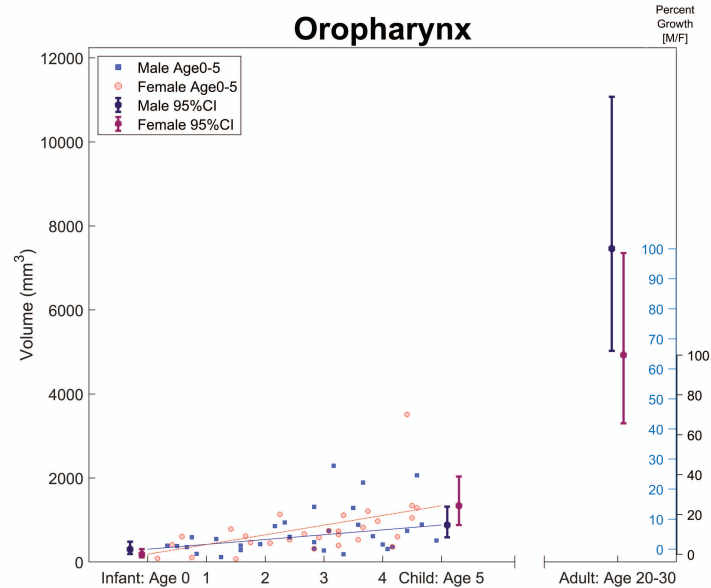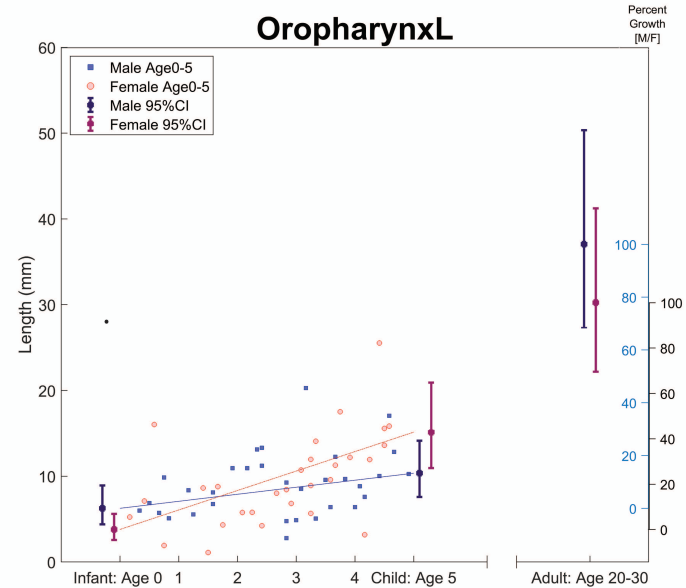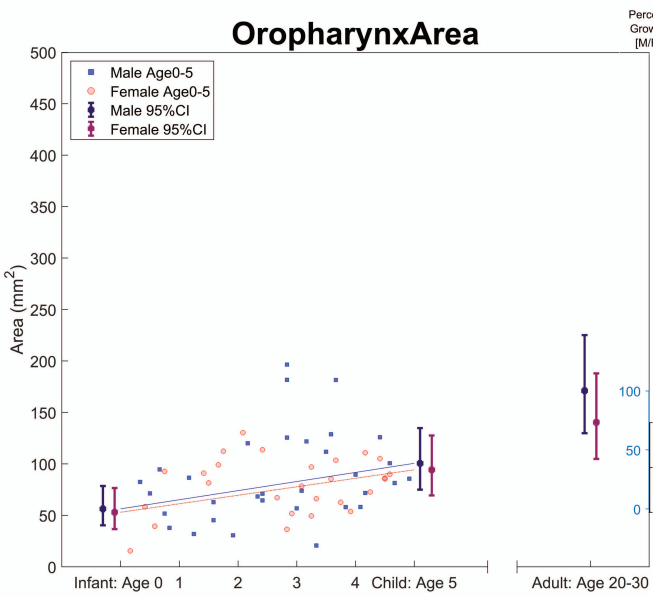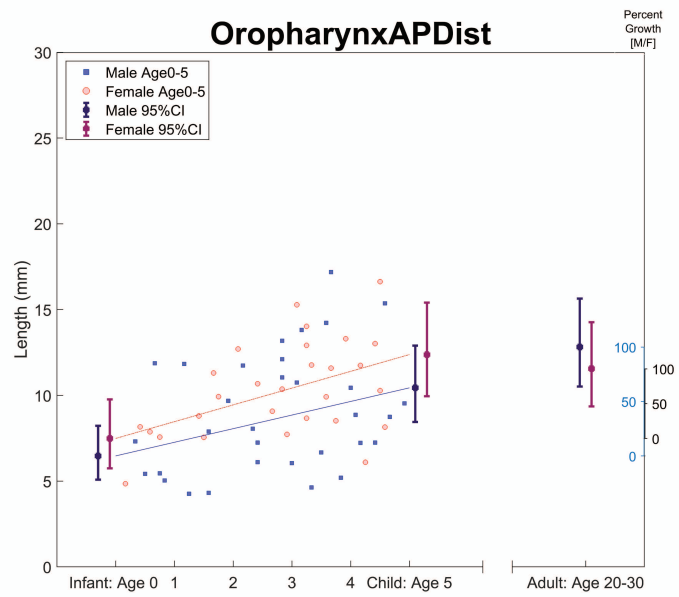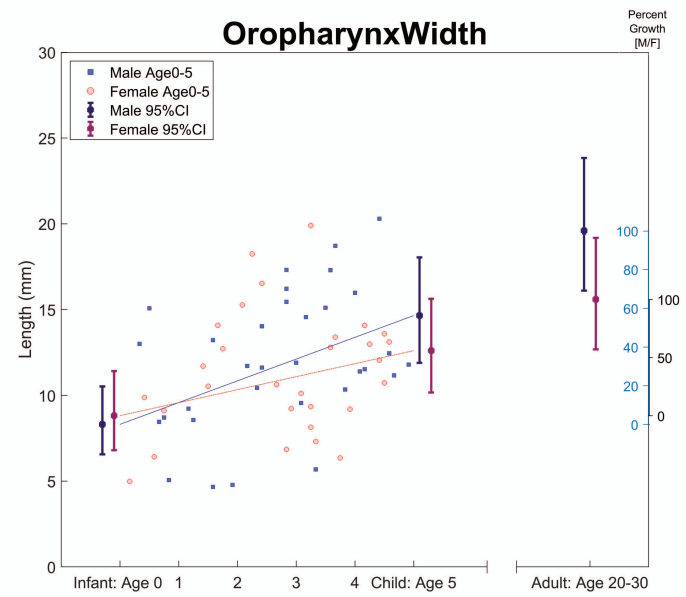

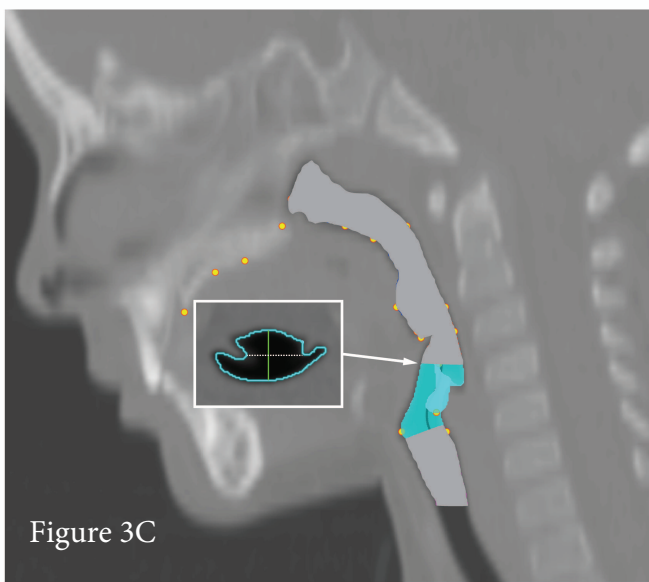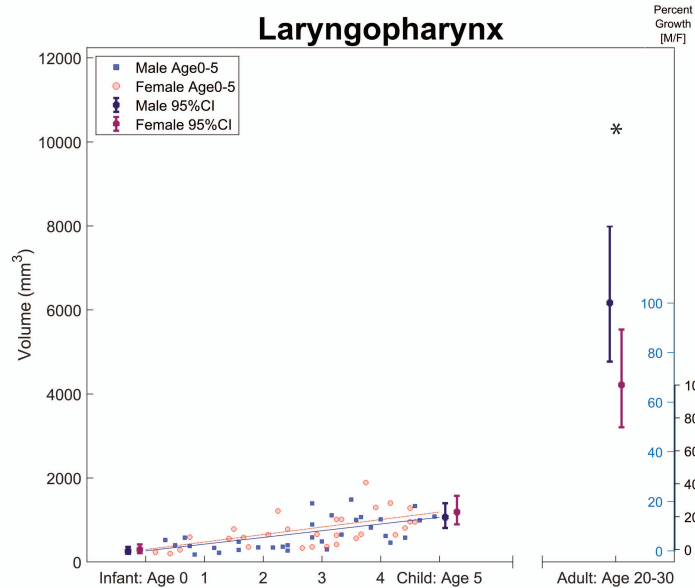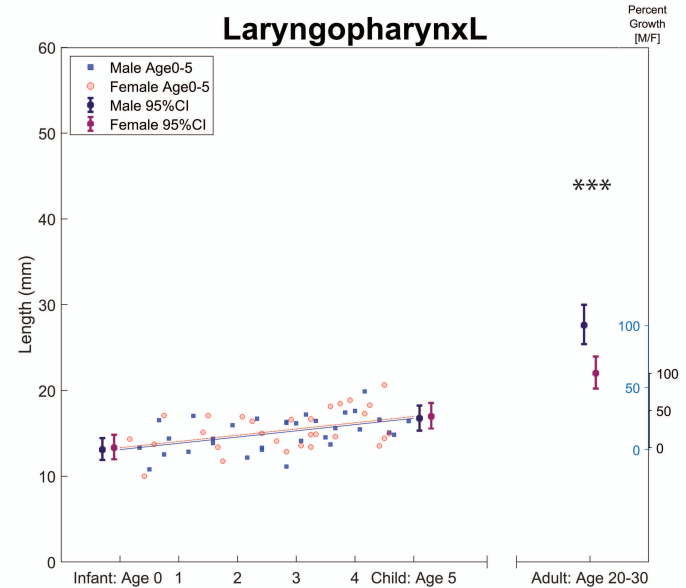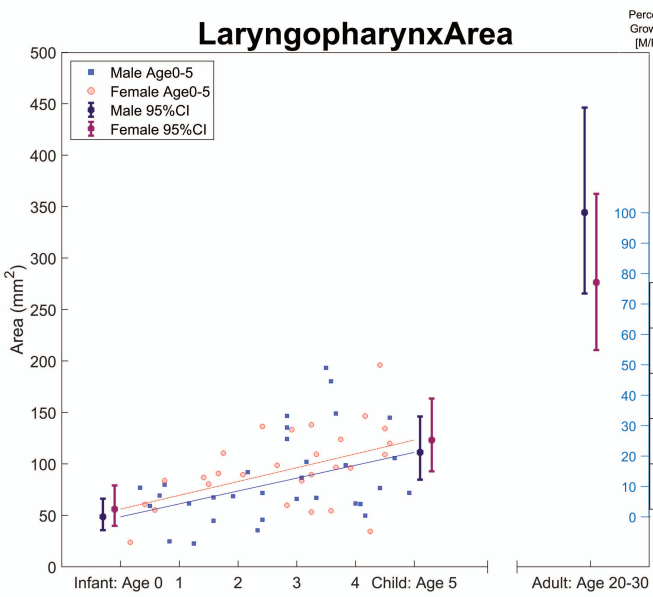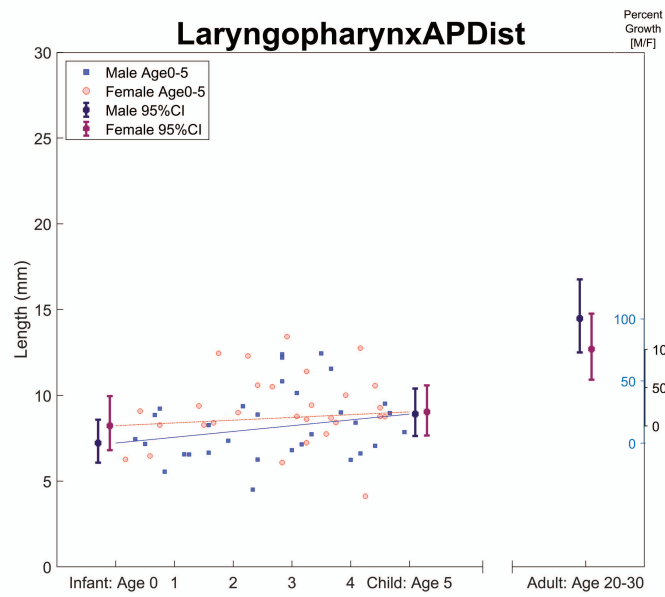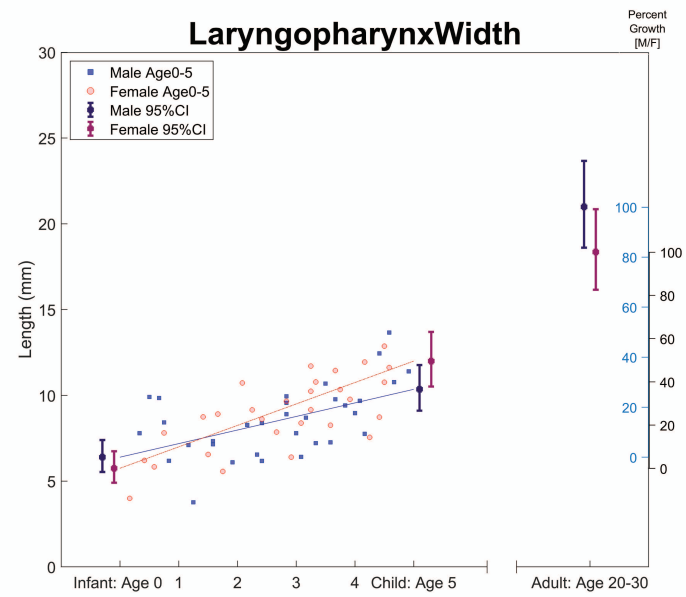



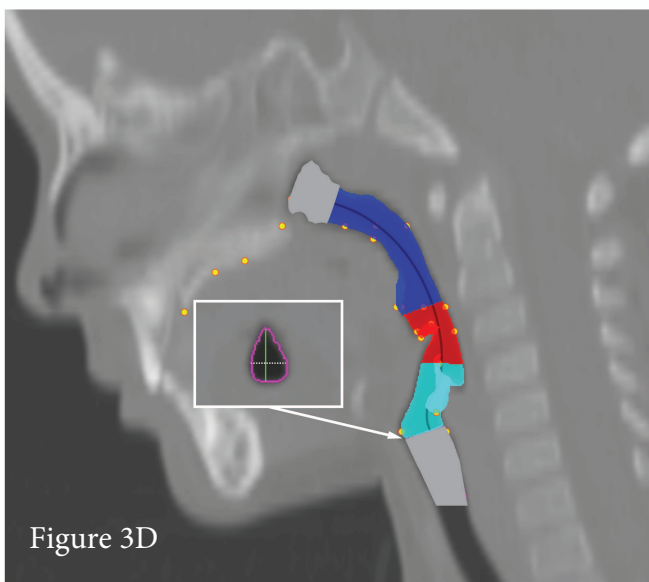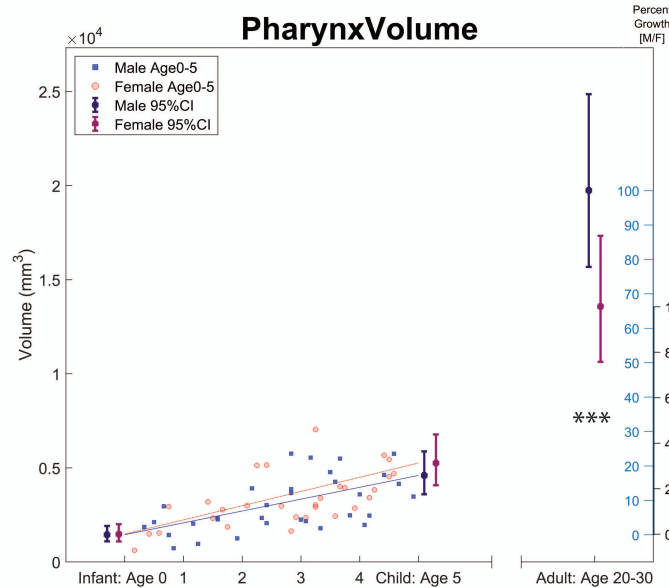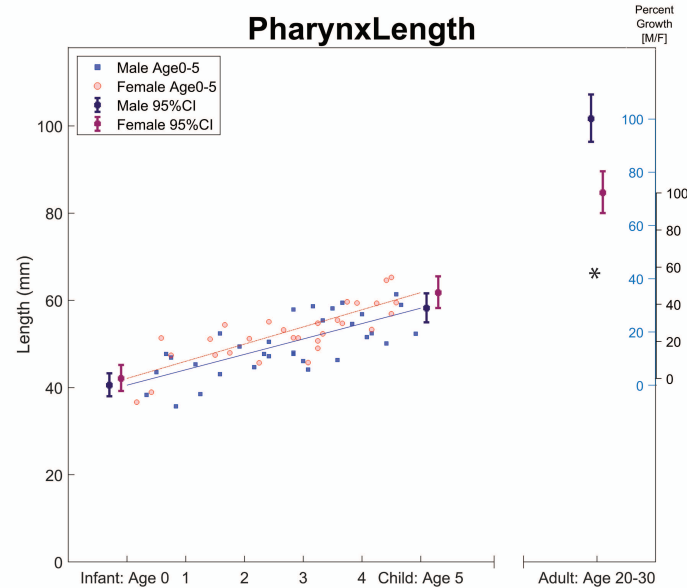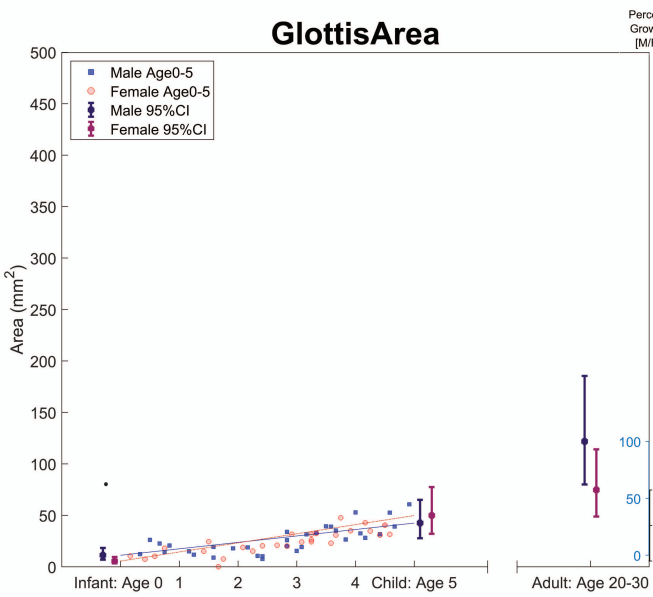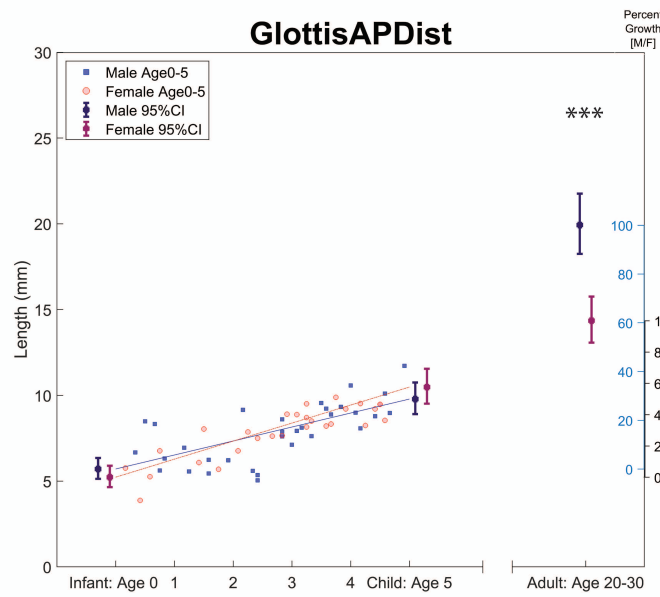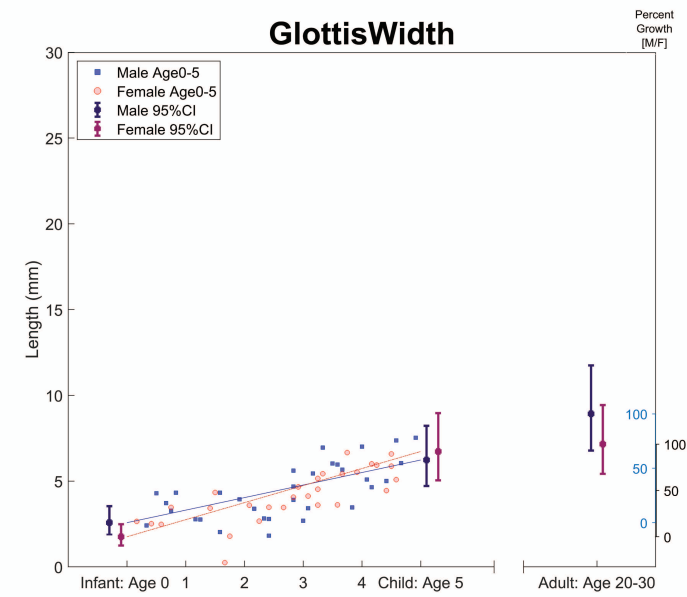

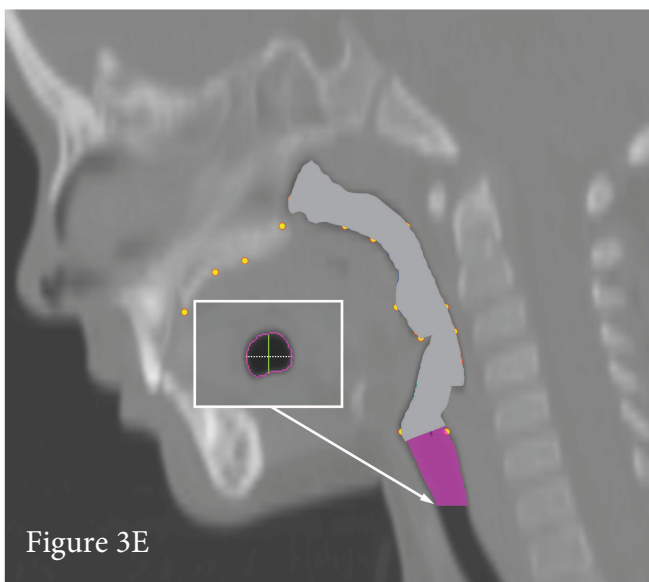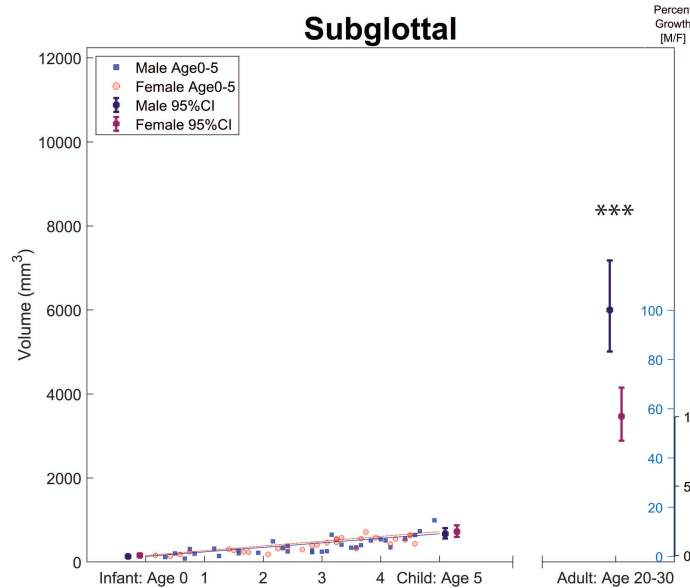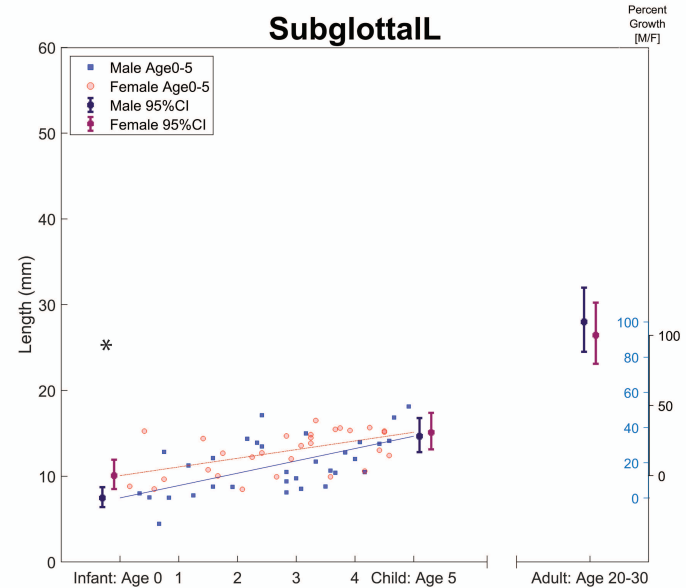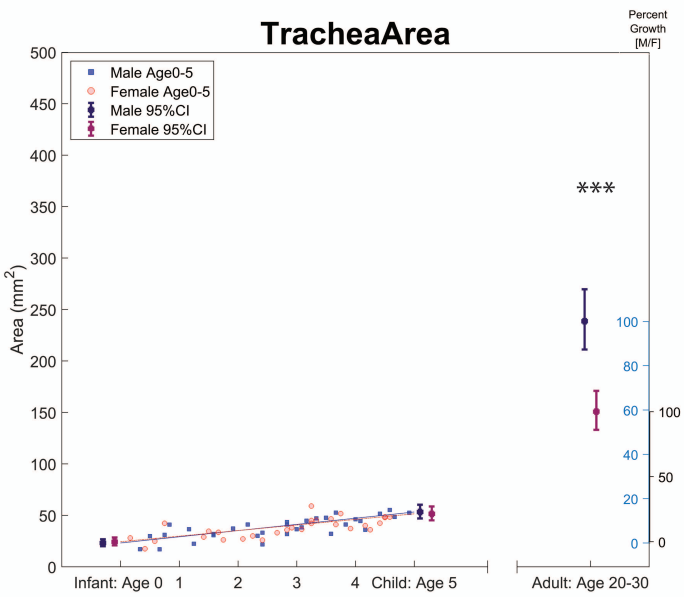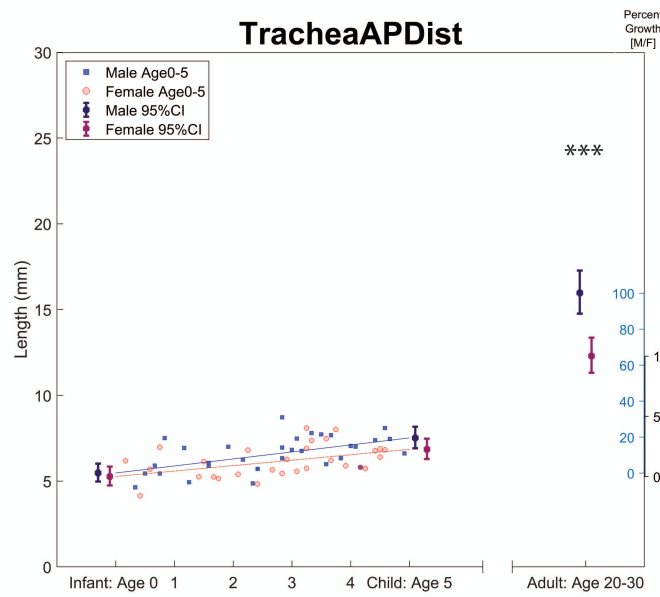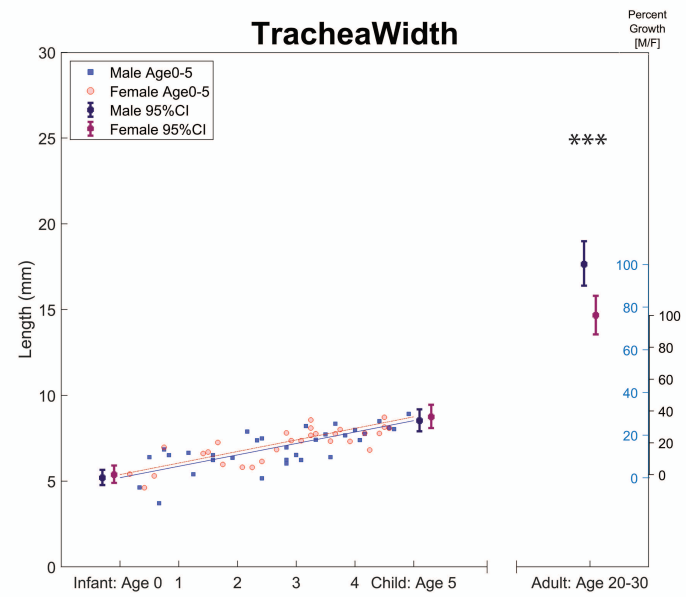

Source: http://biorxiv.org/content/10.1101/2021.10.26.465942v1.full.pdf
